# Supplementary material for: Targeting Notch Signaling to Restore Neural Development and Behavior in Autism
Source: Research Square preprint supplement (doi:10.21203/rs.3.rs-6343474/v1), 2025-04-23
Supplement: Supplementary file 1 [file 441f1b2c7d91d7dca013a6bd.xlsx]

## Sheet: Supplementary Table 1
Table of differentially upregulated genes from bulk RNA-sequencing of embyonic VPA vs. Control brain (p-value <0.05)
Gene Symbol	log2FoldChange	p-value
Gm13394	1.37823	2.44776e-178
Xist	12.9764	1.8299e-124
Eif2s3x	0.645199	9.20322e-41
Kdm5c	0.615932	3.99601e-33
Neurog2	0.577417	1.09519e-29
Ldha	0.523288	6.97584e-29
Pgk1	0.480668	9.66165e-24
Slc4a1	1.49094	3.34984e-22
Invs	1.10568	1.09565e-21
Nnat	0.351859	4.43804e-21
Slc15a2	1.00115	3.44604e-20
Eno1	0.388741	5.66283e-18
Gm4735	0.498492	2.78886e-17
Rplp0	0.312169	9.33267e-17
Tpi1	0.424962	1.19759e-16
Fn1	0.411349	1.65909e-16
Rpl18a	0.371606	2.00093e-16
Pkm	0.286179	8.76e-16
Txnip	0.512875	3.55869e-15
Spp1	2.59568	4.21542e-15
Hmgcs1	0.329181	5.34157e-15
Dnajc1	0.790187	1.7057e-14
Rack1	0.296723	3.89754e-14
Vim	0.282176	4.51298e-14
H1f2	1.18918	6.59056e-14
Rplp2	0.297335	1.16253e-13
Ckb	0.286194	5.0337e-13
Pfkl	0.401055	7.44794e-13
Kdm6a	0.582461	1.57691e-12
Lrp4	0.523918	7.38832e-12
Eomes	0.370495	1.25238e-11
Tead2	0.379357	1.94938e-11
Pgam1	0.334015	2.05848e-11
Eef1a1	0.234494	2.13603e-11
Hba-x	1.20387	2.6516e-11
Rps8	0.274272	4.42028e-11
Hspg2	0.451956	6.37156e-11
Notch1	0.41002	9.39429e-11
Fgfr3	0.374646	1.02238e-10
Dhcr24	0.357034	1.12287e-10
Hba-a1	0.352094	1.23551e-10
Aldoa	0.354207	1.52666e-10
Gm15500	0.487071	1.88437e-10
ENSMUSG00000120777	7.89941	2.80592e-10
Rhbdl3	0.41408	3.48343e-10
Mif	0.287539	4.86119e-10
Adgrv1	0.541541	6.10722e-10
Dlk1	0.377039	6.24192e-10
Ddr1	0.259374	6.57503e-10
H13	0.349278	7.89843e-10
Rpl23	0.279314	9.1554e-10
Fdft1	0.307829	1.11872e-09
Mvd	0.510477	1.35948e-09
Rpl13a	0.537141	3.71423e-09
Ago1	0.229163	4.16051e-09
Tef	0.410673	5.49038e-09
Lss	0.363338	6.14103e-09
Dnpep	0.416774	6.29682e-09
Hcfc1	0.303883	6.39521e-09
Eno1b	0.409053	8.17631e-09
Slc16a3	1.05563	8.53974e-09
Rps5	0.235801	9.43341e-09
Hnrnpm	0.204653	1.02374e-08
Fasn	0.310185	1.16545e-08
Chd4	0.25459	1.62012e-08
Rpl4	0.196518	1.62053e-08
Arfgef2	0.433933	2.65946e-08
Hmgcr	0.254716	2.99864e-08
Rps15	0.241811	5.02147e-08
Chd7	0.347537	5.40238e-08
Rps9	0.211846	6.345e-08
Uhrf1	0.306499	8.13117e-08
Rpl28	0.223102	8.16054e-08
Mki67	0.3416	8.75956e-08
Sall1	0.352004	1.0734e-07
Sympk	0.247704	1.18656e-07
Btg2	0.393835	1.20837e-07
Mybbp1a	0.252263	1.43541e-07
Gm15772	0.239006	1.49691e-07
Rpl12	0.227025	1.90768e-07
Acat2	0.282149	2.20882e-07
Hes6	0.290865	2.32417e-07
Prkd3	0.293207	2.32584e-07
Nr2e1	0.341947	2.47157e-07
5530601H04Rik	0.538512	2.77022e-07
Tspan18	0.338823	2.93074e-07
Notch2	0.407973	3.50996e-07
Arid1a	0.248202	3.56076e-07
Ccnd2	0.199542	3.63079e-07
Rpl36a	0.24901	3.75839e-07
Pcbp2	0.281256	3.84041e-07
Igfbp2	0.290847	3.84902e-07
Ldb1	0.24441	3.95777e-07
Vegfa	0.407801	4.19629e-07
Rps3	0.190141	4.65189e-07
Rcor2	0.230384	5.32836e-07
Acly	0.198464	5.34055e-07
Serpinh1	0.235451	5.84138e-07
Igsf8	0.31484	6.1004e-07
Noc2l	0.42888	6.46457e-07
Rpl5	0.207454	8.72574e-07
Gtf2i	0.18075	1.08095e-06
Kmt2d	0.291356	1.09243e-06
Plxnd1	0.269029	1.13003e-06
Ldlr	0.456067	1.15726e-06
Pcbp1	0.187594	1.19616e-06
Rps4x	0.19075	1.29756e-06
Rps6	0.187248	1.32916e-06
Oaz2	0.247061	1.4826e-06
Ptbp1	0.251209	1.50119e-06
Fzd8	0.317282	1.60686e-06
Setd1b	0.329402	1.64541e-06
Snrnp200	0.256316	1.65446e-06
Wars	0.322344	1.67603e-06
Smo	0.292454	1.7868e-06
Sfrp1	0.22617	1.80381e-06
Mfap2	0.29767	1.92587e-06
Baz1b	0.208305	2.07476e-06
Phc2	0.21762	2.4464e-06
Rpl31	0.189359	2.81504e-06
Mcm3	0.296058	3.08542e-06
Grb10	0.19032	3.23604e-06
Ddx21	0.232969	3.31261e-06
Polr2a	0.269351	3.57577e-06
Gon4l	0.328528	3.63465e-06
Fbn2	0.35575	3.71715e-06
Rpl13	0.189511	3.71883e-06
Kpnb1	0.200751	3.89145e-06
Rcc2	0.229779	4.34066e-06
Gnai2	0.166766	4.38412e-06
Sqle	0.244387	4.40548e-06
Rpl18	0.191596	4.46045e-06
Gm15427	0.346071	4.81409e-06
Plxna2	0.21795	4.83556e-06
Psmc3ip	0.562842	5.02186e-06
Lgals1	0.440726	5.17958e-06
Erf	0.381458	5.23864e-06
Hbb-bh1	2.32001	5.59314e-06
Hmcn1	0.895749	5.82777e-06
Ptprf	0.223676	6.11672e-06
Chd3	0.188973	6.37729e-06
Prpf8	0.252401	6.48122e-06
Dhcr7	0.326911	6.56519e-06
Hspa8	0.180317	6.6305e-06
Jun	0.299455	6.7776e-06
Gm15459	0.208625	6.80286e-06
Rps11	0.17108	6.97247e-06
Rps7	0.259581	6.99166e-06
Ppp1cc	0.197355	8.04336e-06
Tpt1	0.169875	8.09273e-06
Plpp3	0.271362	8.1372e-06
Srebf2	0.170315	8.743e-06
Bst2	1.04253	9.00897e-06
Rpl27a	0.22942	9.15181e-06
Hhipl1	0.666923	9.67073e-06
Ncor2	0.248135	9.95632e-06
Eef2	0.177746	1.04008e-05
Gadd45g	0.336429	1.10156e-05
Prmt1	0.194136	1.12363e-05
Ncl	0.173575	1.13376e-05
Crb2	0.375217	1.14172e-05
Zfp646	0.275849	1.1631e-05
mt-Rnr1	0.269559	1.21084e-05
mt-Rnr2	0.511363	1.2457e-05
Ep300	0.272419	1.25215e-05
Mdn1	0.318984	1.34176e-05
H2az2	0.232945	1.34328e-05
Mcm7	0.236443	1.3715e-05
Mcm5	0.290272	1.37937e-05
Rnd3	0.211777	1.48552e-05
Smarca4	0.171886	1.48706e-05
Pax6	0.273947	1.51055e-05
Ctdsp2	0.230605	1.6357e-05
Rpl11	0.174204	1.63885e-05
Tuba1c	0.603193	1.65975e-05
Golga4	0.21626	1.90359e-05
Mrs2	0.402773	1.94086e-05
Rps16	0.179902	1.94599e-05
Nhlh1	0.382488	1.97474e-05
Acin1	0.182434	2.07032e-05
Nxn	0.321682	2.07081e-05
Zfp664	0.182683	2.12171e-05
Nr2f1	0.173751	2.23464e-05
Ubtf	0.181463	2.28074e-05
Dennd5a	0.186772	2.28292e-05
Hnrnpc	0.167232	2.32148e-05
Rprm	0.236454	2.39662e-05
Hemgn	2.91606	2.48852e-05
Nedd4	0.149713	2.50474e-05
Ep400	0.266616	2.5394e-05
Proser3	0.494474	2.54297e-05
Plxnb1	0.178643	2.54574e-05
Igf2bp1	0.282388	2.56897e-05
Phf21b	0.228709	2.67076e-05
Rpl34-ps1	0.215137	2.70324e-05
Lhx2	0.181181	2.73914e-05
Hspa5	0.183344	2.76127e-05
Ccnd1	0.273633	2.91019e-05
Myo10	0.248636	2.9518e-05
Birc6	0.262227	2.95643e-05
Hbb-y	1.30272	3.01744e-05
AI837181	0.356387	3.13292e-05
Numa1	0.177213	3.24044e-05
Lama1	0.440091	3.40329e-05
Lamb1	0.295366	3.44806e-05
Idi1	0.357668	3.53509e-05
Kel	2.24395	3.55843e-05
Nde1	0.287824	3.65178e-05
Aspm	0.314282	3.76582e-05
Cntfr	0.257329	3.82742e-05
Srrm2	0.145952	3.83681e-05
Insig1	0.322402	3.86208e-05
Rps17	0.165563	3.99352e-05
Kmt2a	0.272633	4.01009e-05
Pprc1	0.324007	4.13815e-05
Masp1	0.238737	4.21597e-05
Efhd2	0.238488	4.26143e-05
Ptma	0.137544	4.37632e-05
Scd2	0.139212	4.59605e-05
Sema5a	0.314944	4.67472e-05
Rpl6	0.158511	4.69073e-05
Celsr2	0.216558	5.25482e-05
Gm8121	0.824214	5.95164e-05
Dhx38	0.249666	5.96112e-05
Med16	0.300671	6.0145e-05
Blcap	0.188991	6.36774e-05
Actl6a	0.289391	6.37115e-05
Dchs1	0.199016	6.38023e-05
Hsp90ab1	0.139057	6.55234e-05
Gm19554	0.54339	6.6122e-05
Pdia4	0.235402	6.68944e-05
Zfp362	0.228652	6.98089e-05
Ran	0.161037	7.11604e-05
Smad3	0.348889	7.2081e-05
Vwa1	0.401193	7.29363e-05
Gli3	0.288894	7.37039e-05
Fras1	0.51756	7.57774e-05
Eif4h	0.164239	7.73506e-05
Zfp609	0.202334	7.77995e-05
Llgl1	0.191634	7.8506e-05
Igf2bp2	0.320308	8.42325e-05
Mfng	0.302926	8.67759e-05
Rnd2	0.229171	8.71534e-05
Sptbn2	0.178896	8.76316e-05
Ago2	0.244702	8.9617e-05
Zswim5	0.23255	9.07071e-05
Gpc1	0.209108	9.48319e-05
Ssrp1	0.17396	9.51586e-05
Rps12-ps3	0.236964	0.000101269
Maz	0.174414	0.000107098
Rps14	0.171518	0.000108328
Rps26-ps1	3.82484	0.000109545
Neurog1	0.806249	0.000111523
Rpl32	0.16582	0.000114571
Hnrnpu	0.138772	0.000120684
Efnb1	0.178398	0.00012172
Thsd4	0.34849	0.000123846
Uqcrc1	0.201138	0.000125493
Rpl8	0.150571	0.000125762
Ctnna1	0.196406	0.000128967
Hnrnph3	0.203927	0.000132972
Eftud2	0.194728	0.00013991
Anp32b	0.184589	0.00014152
Rpl15-ps6	4.50321	0.000142919
G3bp1	0.165549	0.000143677
Nsdhl	0.336384	0.000144255
Sh3pxd2a	0.258285	0.000144495
Cacng7	0.231751	0.00014583
Klhl17	0.339503	0.000146696
Arhgdia	0.154937	0.000148044
Syt13	0.232876	0.000150922
Podxl	0.249385	0.000152054
Slc1a5	0.535486	0.000153411
Adgrg1	0.15333	0.000156866
Rpl31-ps21	5.72864	0.000157249
Gpi1	0.245558	0.000158042
Lamc1	0.253691	0.000161792
Ptpru	0.267305	0.000162354
Sf3a1	0.176133	0.000164702
Vangl2	0.183992	0.000164782
Atp5a1	0.124946	0.000166961
Rps23	0.180743	0.000171818
Tuba4a	0.937511	0.000173949
Gm49909	2.32867	0.0001742
Prag1	0.266298	0.000175183
Slc38a2	0.166109	0.000178427
Eif4a1	0.134473	0.000178837
Tcf3	0.200479	0.0001841
Gm15163	1.12472	0.000188637
Nid2	0.267362	0.00018879
Cacfd1	0.211961	0.000189896
Nup50	0.234814	0.000193662
Zfp516	0.282959	0.000197458
Cct5	0.148524	0.000198305
Slc25a5	0.172793	0.000201619
Pan2	0.270209	0.000205015
Shmt2	0.256845	0.000208216
Phactr4	0.304007	0.000210583
Ajuba	0.389956	0.000211581
Hmox1	0.580891	0.000212829
Srsf3	0.148183	0.000218445
Disp3	0.352292	0.000220381
Gm5089	4.53955	0.000220634
Hnrnpf	0.178812	0.000231434
Puf60	0.17416	0.000233382
Mbd3	0.178106	0.000235096
Kdm6b	0.166376	0.000235348
Ddx6	0.170771	0.000237698
Rps13	0.182903	0.000240848
Ddx23	0.188693	0.000249503
Galk1	0.351717	0.00025195
Supt6	0.197449	0.000253931
G530011O06Rik	2.70024	0.000254342
Tmpo	0.169674	0.000258582
Aacs	0.238834	0.000261753
Ncoa6	0.234833	0.000263091
Gm9794	0.188957	0.000267305
Fads2	0.165998	0.000272078
Phf5a	0.270735	0.000277781
Psat1	0.214668	0.000280171
Parp1	0.151822	0.000284834
Erdr1	1.7953	0.00028978
Slc20a1	0.233909	0.000297772
Spata13	0.209449	0.000307739
Unc119b	0.240018	0.000311942
Rpl3	0.159409	0.000314488
Sulf2	0.193162	0.000316681
mt-Te	0.998824	0.000317112
Aco2	0.15861	0.000326316
Nisch	0.135039	0.000329793
Cdc37	0.173795	0.000336086
Ppp2r3d	0.23216	0.000341438
Nipbl	0.18863	0.000341885
Cdc20	0.290379	0.000343815
Eif4ebp2	0.166158	0.000347757
Snora57	1.67565	0.000354161
Cbx2	0.250299	0.00035449
Yap1	0.246314	0.000365415
Pfn1	0.163724	0.000383646
Cyp46a1	0.56437	0.000384132
Glg1	0.160142	0.000388215
Rplp1	0.157411	0.000389611
Msmo1	0.271068	0.000389767
Dll1	0.23841	0.000389971
Iars	0.197046	0.000405291
Mars1	0.212914	0.000411741
Snx5	0.288642	0.000413014
Rps24	0.158697	0.000413106
Inppl1	0.212971	0.000418357
Ints7	0.224267	0.000420383
Kcng1	0.370426	0.000430112
Rpl9	0.166295	0.000435931
Src	0.184105	0.000449561
Pdia6	0.183481	0.000451058
Gm5518	0.263581	0.00045179
Rpl7	0.141539	0.000457628
Cnot1	0.157111	0.000460463
Cherp	0.205843	0.000475558
Gm11839	5.48144	0.000476048
Zc3h13	0.211585	0.000481914
Srsf7	0.153865	0.000497848
Vamp3	0.264093	0.000501422
Cyth2	0.186552	0.000504694
Slc35b2	0.301064	0.000505924
Cnn3	0.137612	0.000507184
Ehmt2	0.146493	0.000508375
Mcam	0.314446	0.000521225
Celsr1	0.453263	0.000524708
Prdm16	0.250528	0.000530249
Aldoc	0.213781	0.000533548
Vwa8	0.36769	0.00053988
mt-Nd5	0.178601	0.000553638
Pbdc1	0.443822	0.000564927
Gm22490	5.41064	0.000565348
Flnb	0.218775	0.000569068
Racgap1	0.194424	0.000583864
Ruvbl2	0.205272	0.000584772
Nup210	0.22283	0.000596889
Raly	0.159648	0.000607059
Trim56	0.435091	0.000608995
Col1a1	0.250248	0.000614814
Slc2a1	0.228643	0.000622459
Exosc7	0.328607	0.000627179
Ctnnb1	0.136723	0.000640345
Gm8666	1.4079	0.000640614
Notch3	0.249592	0.000645159
Col18a1	0.227187	0.000648767
Eif3b	0.153986	0.000649512
Npm1	0.165129	0.000661542
Carm1	0.192601	0.000665149
Hnrnpa1	0.104181	0.000696266
Smad5	0.163375	0.000710942
Sf3b3	0.172712	0.000713811
Rpl19	0.173996	0.000731356
Ccnb1	0.235896	0.000740092
Rpl37	0.187539	0.000747235
E2f4	0.271842	0.000756239
Caskin2	0.296156	0.000768883
Csnk2a1	0.162059	0.000770733
Med24	0.180668	0.000778346
Zswim4	0.208627	0.000778751
Szrd1	0.20202	0.000794669
Gsta4	0.37703	0.000800122
Naca	0.13129	0.000806219
Fscn1	0.129496	0.000814593
Gm11808	0.239281	0.000817742
Vezf1	0.166204	0.000819618
Tfip11	0.237455	0.000836142
Kat6b	0.1696	0.000847107
Tgm2	0.48729	0.000848868
Peg10	0.204115	0.00085171
Cct3	0.143162	0.000855702
Ttll12	0.235527	0.000860396
Oaz1	0.151364	0.000869735
Gid4	0.220806	0.000876792
Fam168b	0.124699	0.000887856
Kif2c	0.29184	0.000917924
D930028M14Rik	0.980375	0.000919682
Ccdc88c	0.197525	0.000929226
Dpp9	0.240604	0.000935205
Smarcd1	0.154687	0.000944931
Ascl1	0.209709	0.000959374
Tjap1	0.31656	0.00096465
Dnm3os	1.53455	0.000994257
Ttll4	0.211057	0.00101093
Hk2	0.392402	0.00101304
Wnk1	0.176048	0.00103476
Rps18-ps5	0.248082	0.00105026
Psmb1	0.193068	0.00107138
Ctsd	0.216386	0.00107491
Hnrnpa2b1	0.104891	0.00108841
Crebbp	0.175461	0.00109171
Usp18	2.75154	0.00109196
Nuak2	0.399622	0.00109248
Gpnmb	1.93163	0.00109996
Rpl3-ps1	0.147352	0.00110321
Rbm10	0.175212	0.00111019
P4hb	0.141659	0.00116877
Tmem131l	0.145854	0.00117409
Slc38a1	0.196449	0.00117428
Gps1	0.214439	0.00118369
Spen	0.189619	0.00121756
Bend3	0.272647	0.00121878
Kif21a	0.147075	0.00121896
Gtf3c1	0.179721	0.00122372
Gcn1	0.164114	0.00124021
Fau	0.137675	0.00124371
Tmed4	0.202817	0.00124692
Tnrc18	0.135243	0.0012547
Mbtd1	0.185678	0.00128332
Gm47283	1.35386	0.00128714
Fam53b	0.256797	0.00132831
Gm44837	0.845494	0.00133241
Ube2c	0.25321	0.00134724
Setbp1	0.187155	0.00134929
Emx1	0.264739	0.00137058
Msi1	0.168959	0.00142688
Slc35a4	0.242489	0.00144029
Pcnt	0.230932	0.00144706
Ppp6r3	0.156287	0.00145069
Rcn3	0.329237	0.00146807
Slit2	0.244658	0.00147604
Limd1	0.283865	0.0014885
Prom1	0.265642	0.00150051
Hsph1	0.14423	0.00150076
Map4k4	0.115736	0.00150421
Mir9-3hg	0.250198	0.00151322
mt-Co1	0.131299	0.00152721
Pon2	0.363668	0.00153031
Ubap2	0.17364	0.00154918
Mtor	0.198542	0.00155003
Nr1d2	0.389722	0.00158245
Crabp2	0.474997	0.0015862
Homer3	0.262828	0.00160959
Zfp219	0.186313	0.00163283
Nono	0.1106	0.00169044
Gm12960	0.252128	0.00169399
Nsun2	0.199167	0.00170605
Foxj1	0.361551	0.0017095
Lyve1	0.433879	0.00171051
Lamb2	0.272019	0.00172484
Nop2	0.237107	0.00173226
Trip12	0.13256	0.00173374
Rabggtb	0.279658	0.00174338
Gm8292	0.599518	0.00175583
Mt3	0.58546	0.00176126
Dpf2	0.181682	0.00177196
Boc	0.264477	0.00182256
Eif4a-ps4	0.14844	0.00182325
Plce1	0.273985	0.00182723
Phgdh	0.283051	0.00184155
Obsl1	0.233645	0.0018472
Mcm2	0.183557	0.00185234
Ttyh3	0.120969	0.00187396
Rgs12	0.171396	0.00187679
Trrap	0.178639	0.00187704
Fzd1	0.221894	0.00190118
Phf8	0.215646	0.00194981
Plin3	0.43328	0.00195159
Scrt1	0.149501	0.0019544
Sf3b2	0.122023	0.00196239
Casp2	0.204325	0.00200095
Prrc2c	0.18393	0.00204826
Akap13	0.246283	0.00205161
Pdlim5	0.341073	0.00205196
Hmgb1-ps2	0.348177	0.00205261
Kdm5b	0.125964	0.00209091
Rnf114	0.190394	0.00214027
Cnot3	0.194044	0.00214218
Sdad1	0.252737	0.00214738
Gm37194	2.2993	0.00214738
Ptov1	0.126467	0.00214903
Ubald2	0.204276	0.00215082
Fgf17	0.908296	0.0021971
Otp	0.32694	0.00221913
Cachd1	0.221725	0.00223522
Prrc2a	0.13962	0.00223699
Nup62	0.233413	0.00223941
Mid1-ps1	1.93582	0.00224427
Ildr2	0.222835	0.00227118
Sstr2	0.267427	0.00227659
Rrbp1	0.210653	0.00227758
H1f0	0.163881	0.00229027
Peg12	0.328979	0.00229087
Rps18-ps3	0.621995	0.00230231
Cyp51	0.179762	0.00231254
Csnk1d	0.12657	0.00233396
Gpc3	0.299818	0.00235013
Unc13b	0.175751	0.00235094
Snrpc	0.209143	0.00236694
Gm266	1.95511	0.00238131
Rnf44	0.138954	0.00239622
Gpc4	0.247549	0.00240174
Elapor1	0.463277	0.0024492
P4ha1	0.27724	0.00246024
Cnbp	0.124436	0.00248506
Zfp146	0.167135	0.00249789
Pes1	0.206758	0.00251186
Polr2e	0.199963	0.00251338
Rai14	0.205492	0.00252953
Crb1	0.530132	0.00254962
Reep3	0.197129	0.00256243
Cep250	0.219418	0.0025901
Heatr1	0.237306	0.00259233
Phf2	0.161077	0.00261083
Hif3a	0.375451	0.00268073
Shisa2	0.32208	0.00272089
Fzd2	0.190332	0.00274726
ENSMUSG00000120954	2.98737	0.00276155
Chd8	0.159079	0.00276728
Farsa	0.194873	0.00277572
Ltbp1	0.303344	0.00279396
Guf1	0.236612	0.00279745
Itga11	0.465756	0.00281133
Fbxl19	0.139472	0.00286444
Eif4a3	0.151957	0.00289538
Dhx32	0.222181	0.00289619
Gab1	0.205303	0.00293159
Smdt1	0.279821	0.00298636
Col11a2	0.366038	0.00300898
Colec12	0.256135	0.00301165
Hdac5	0.156378	0.00305162
Rpl23a	0.181005	0.00313228
Poldip3	0.160448	0.00315
Col4a2	0.164461	0.00317371
Tenm4	0.201788	0.00319561
Rnf169	0.267135	0.00320508
Atxn2	0.173388	0.00321715
AI467606	1.21906	0.00324049
Gtf3c6	0.22457	0.00324727
Apln	0.436646	0.00326514
Pdk1	0.388754	0.00329947
Zfp740	0.141589	0.00334871
Slc22a23	0.168641	0.00335311
Prex1	0.148554	0.00343885
Rps10-ps2	0.186716	0.00347743
Ung	0.482347	0.00347952
Gypa	1.14387	0.00349344
Eef2-ps2	0.395621	0.00351283
Prdx6	0.202008	0.00351286
D030055H07Rik	0.550398	0.00351863
Mdh2	0.14863	0.00351993
E2f1	0.276331	0.00352947
4930522L14Rik	1.34785	0.00353049
Hnrnpab	0.0945523	0.00354029
Banp	0.222829	0.00354222
Knstrn	0.234811	0.00354779
Ftl1	0.138481	0.00355079
Gm14150	2.3374	0.00356992
A530016L24Rik	2.44477	0.00358139
Col12a1	0.458505	0.00358803
Mn1	0.132449	0.0036005
Txlna	0.163901	0.0036192
Dkc1	0.230052	0.00362992
Ndufv1	0.16067	0.00368786
Mcm6	0.158037	0.00372583
Rhag	2.97499	0.00372799
Tcf7l1	0.362485	0.00374582
Eml5	0.188755	0.00376535
Unc5b	0.264132	0.00379175
Ptpn13	0.252743	0.00380996
Bptf	0.156743	0.0038316
Tspo2	2.32793	0.00384182
Rad54l2	0.179752	0.00386882
Acsf2	0.543723	0.00389068
Baz2b	0.165026	0.00389542
Spef1	0.194997	0.00391034
Gm6710	1.02131	0.00392012
Eef1b2	0.143244	0.00400596
Nr1h2	0.221001	0.00400947
Rab1b	0.16054	0.00402017
Arrdc4	0.246833	0.00403115
Mest	0.161276	0.00403807
Gm9761	0.391903	0.00407584
Trim28	0.105471	0.00412296
U2af2	0.119551	0.0041393
Tmem132c	0.298013	0.00415217
Dip2b	0.180764	0.0041557
Akt2	0.149955	0.00416671
Gm3226	1.05215	0.00417533
Mapk3	0.211329	0.00420475
Tent5c	0.451563	0.00421408
Atg2b	0.208162	0.00422167
Hspa9	0.132628	0.00427552
Fiz1	0.219779	0.00436424
Foxo4	0.246734	0.00439646
Txn2	0.191008	0.00444727
Flnc	0.286155	0.00444874
Ulk1	0.149829	0.00448557
Adh5	0.179674	0.00449618
Wdfy3	0.174652	0.00450177
Mta2	0.141449	0.00457413
Ndufa12-ps	0.312417	0.00458169
Kars	0.136268	0.00458331
Zmiz1	0.156921	0.00460872
Aldh16a1	0.342688	0.00465024
Rtl5	0.180489	0.00466762
Hsd3b6	1.88705	0.00475956
Rpl27	0.130039	0.00476204
Grap2	1.89222	0.00477042
Ier2	0.339402	0.0048059
Tbl3	0.218494	0.00481627
Nsl1	0.404958	0.00484993
Spta1	1.08237	0.00485564
Gas1	0.236761	0.00486638
Gm6937	4.92157	0.00489545
Ednrb	0.184047	0.00495247
Eya4	0.679978	0.00495984
Plxna4	0.197453	0.00498438
Arhgap21	0.136077	0.00498474
Nt5dc2	0.15044	0.0049998
Eif3g	0.163849	0.00501731
Rps19-ps6	1.77951	0.00501981
H2af-ps2	0.814808	0.00502229
Gm3696	0.908511	0.00506808
Rbpj	0.630679	0.00509923
Adgra3	0.166146	0.00509966
Pak4	0.23777	0.00515323
Mlec	0.140253	0.00520227
Ermap	1.34426	0.00520977
Coq2	0.356169	0.00522103
Hmox2	0.261042	0.00522717
Nap1l1	0.116665	0.00525177
Rnf223	0.837507	0.00525793
Hnrnpk	0.0988109	0.00526244
Hyal2	0.232948	0.00527354
Slc25a3	0.142061	0.00534523
Rpl39	0.166849	0.00537048
Pecam1	0.243357	0.00537084
Msl1	0.130799	0.00544613
Smarcc1	0.109891	0.00545527
Ptk2	0.148834	0.00547807
Aurkaip1	0.272976	0.00548366
Btbd7	0.157807	0.00551763
Gm5560	1.70459	0.005545
Atp1a1	0.1355	0.00555328
Smarcb1	0.141937	0.0055594
Acsf3	0.350776	0.00558316
Dhx8	0.189629	0.00564601
Nkd1	0.19718	0.00566627
Pklr	2.06933	0.00567145
Gm13453	3.74286	0.00572704
Pianp	0.50845	0.00574868
Cd2bp2	0.141493	0.00576961
Rps15a	0.120638	0.00577363
Igfbp5	0.203594	0.00577608
Sox21	0.25245	0.00579194
Nat10	0.223055	0.00585579
Asap2	0.227621	0.00588229
Cdk11b	0.158104	0.00588299
Ddx3x	0.137022	0.00591202
Ddah2	0.141547	0.00591701
Syne2	0.411265	0.00596155
Actr3-ps	1.46459	0.00596571
Ipo13	0.160308	0.00596818
Idh3g	0.173486	0.00598986
Fbl	0.145227	0.00600298
Rab11fip1	0.676944	0.00603401
Trp53bp2	0.168575	0.00605001
Sec14l1	0.134842	0.00605221
Papola	0.113177	0.00608636
Phf23	0.181305	0.00612902
Dhrs4	0.33467	0.00617338
Coro1c	0.140018	0.00620623
Dapp1	0.794391	0.00623496
Sem1	0.176049	0.00624638
Mcrs1	0.172324	0.00627235
Snrpa	0.170588	0.00628229
Neb	0.470402	0.00636883
Nhsl1	0.166482	0.00637196
Sox3	0.211351	0.00638101
Cdon	0.174104	0.00644556
Rrp9	0.249926	0.00645791
Eif4g1	0.0980776	0.00646094
Orc2	0.268621	0.00646726
Tut1	0.250518	0.00653823
Prpf31	0.179042	0.00656927
Cabin1	0.149153	0.00657331
Map4k2	0.233289	0.00661515
Nudt5	0.310842	0.00662682
Alpk1	0.619374	0.00667767
Usp24	0.172014	0.00669409
Prdm9	0.571201	0.00674599
AI506816	2.2267	0.00675163
Egln2	0.154318	0.00677518
Mapkapk2	0.166146	0.00680651
Zpr1	0.236935	0.00681394
Gm13456	0.299602	0.00688039
Eif3a	0.105653	0.00693067
Exoc3l2	1.37463	0.00694922
Ccdc12	0.290896	0.00697377
Nfatc4	0.228582	0.00698181
Emilin2	0.667554	0.00706902
Ap3d1	0.12265	0.00710686
Snrpb	0.138008	0.00713677
Tent2-ps1	2.07293	0.0072712
Wnt9a	0.643325	0.00729365
Olfml1	0.812874	0.00731941
Zfhx2	0.170215	0.00732227
Abcd2	0.269208	0.00742919
Wdr46	0.243999	0.00745811
Ctbp2	0.174495	0.0074741
Pik3ca	0.148333	0.00747705
Nes	0.110784	0.00747975
Srrt	0.139363	0.00752994
Bahcc1	0.132608	0.00755033
Plagl2	0.222189	0.00755297
Cep350	0.19112	0.00755903
Nup188	0.19759	0.00757361
Lsm14a	0.148188	0.00769102
Phip	0.160309	0.00769568
Rpl10a	0.126786	0.0077075
Psme4	0.147432	0.00776543
Nova2	0.125578	0.00782675
Rpl31-ps8	0.224277	0.00783601
Samm50	0.17508	0.00784867
Kctd20	0.143575	0.0078675
Zfp462	0.135231	0.0078939
Crabp1	0.392828	0.00794389
Wbp1l	0.155134	0.00796228
Col6a3	0.321545	0.00806087
Ehd1	0.13959	0.00810056
Chst3	0.377794	0.00814431
Pycr2	0.268258	0.00819022
Ddx39a	0.183945	0.00819538
Cd14	1.21961	0.00821157
Eif3d	0.155682	0.00821531
Tle1	0.155141	0.00822823
Txnl4a	0.212301	0.00823224
Lum	0.327806	0.00823526
Efnb2	0.111661	0.00832459
Zcchc3	0.206641	0.00834811
Hipk2	0.221232	0.00839429
Supt5	0.141272	0.00846192
Gm44645	0.410788	0.00846622
Gm3173	1.15111	0.00849339
Eif3h	0.11619	0.00850295
Yeats2	0.169116	0.00850356
Gart	0.170207	0.00861254
Xab2	0.17196	0.00864528
Midn	0.104714	0.00866016
Nxf1	0.139816	0.0086814
Gm48772	4.68109	0.0087265
Flt1	0.327767	0.00882704
Calr	0.133981	0.00887446
Naa38	0.389466	0.0089217
Heg1	0.183002	0.00898153
Fis1	0.155025	0.00900798
Spon1	0.246905	0.00906254
Ash1l	0.174375	0.00906596
Rpl22	0.108269	0.00907369
Gm3362	0.373934	0.00910264
Lrrc47	0.172064	0.0091137
Gsap	0.416679	0.00911455
Fam83d	0.346942	0.00920724
Gm6402	4.1984	0.00921203
Taf15	0.122399	0.00922866
Lrp5	0.228303	0.00922954
Pcbp4	0.109025	0.00923952
Rlim	0.166557	0.00930819
ENSMUSG00000121230	0.540678	0.00933193
Mllt1	0.124393	0.00939101
Npc2	0.135682	0.0093938
Cep89	0.29629	0.00940285
Ptprs	0.117355	0.00941048
Spop	0.153671	0.00945292
Gnpat	0.161777	0.00948963
Ccdc163	0.550124	0.00950902
Utp20	0.221932	0.00951126
Slc25a39	0.187765	0.00954228
Wdr70	0.277282	0.00955409
Pold2	0.25311	0.00955759
Set	0.0925946	0.00960195
Cad	0.160243	0.00961406
Nelfe	0.236531	0.00964945
Abce1	0.147143	0.00968092
Abcb8	0.246046	0.00976581
Cox4i1	0.1053	0.00977619
Prr12	0.152562	0.00984695
Fat1	0.348742	0.00997232
Ahnak	0.280741	0.00998769
Gm13680	0.404569	0.0100054
Hmgn5	0.230848	0.0101378
Tmem164	0.1814	0.0103395
Gpaa1	0.232756	0.0103398
Pum1	0.128703	0.0103903
Ino80	0.232801	0.0104467
Ube2i	0.133162	0.0104542
Rpl37a	0.26925	0.0104698
Pbx2	0.149882	0.0104751
Tincr	0.808744	0.0104848
mt-Cytb	0.120188	0.0105505
Cdca7	0.166328	0.0106158
Dvl3	0.130383	0.0106326
Ctsb	0.126026	0.0106408
Wbp11	0.140803	0.0106493
H2-K1	0.51217	0.0107237
Mark2	0.146073	0.0107407
Sec24b	0.157857	0.0107654
Rgma	0.146362	0.0107846
Ubap2l	0.122276	0.0108153
Gadd45gip1	0.363389	0.0108196
Ackr3	0.263281	0.0108479
mt-Nd4	0.132492	0.0108726
Olig3	0.631796	0.010873
Sp2	0.351113	0.0108982
Ssr2	0.178912	0.0109111
Tpt1-ps3	0.190664	0.0110028
Tdp2	0.272096	0.0110416
Gm16332	2.14722	0.0111518
Kif23	0.221617	0.0112505
Prr36	0.144153	0.0112941
Uhrf2	0.146312	0.0113395
Med25	0.139708	0.0113887
Fam133b	0.21479	0.0113962
Fam89a	1.38737	0.0114602
Supt16	0.155023	0.0114846
Rpa2	0.235646	0.0115203
Rcn1	0.18552	0.0116779
Yif1a	0.304003	0.0116869
Gm2792	2.39297	0.0116969
Gm42933	4.31729	0.0117237
Ppp1ca	0.115181	0.0118109
Rps20	0.117083	0.0118332
Arcn1	0.122204	0.0120129
Jak3	0.485386	0.0121642
Mrpl23	0.22776	0.0121812
Erbin	0.17638	0.0121984
Snai1	0.943033	0.0122001
Zfp106	0.121882	0.0122259
Hes5	0.413565	0.0123238
Naa35	0.148618	0.012325
Xpo5	0.142516	0.0123333
Mau2	0.139184	0.012394
Ap3b1	0.186005	0.0124235
Pmpcb	0.180077	0.0124465
Ifi27l2a	1.85649	0.0125018
Gm43713	2.36186	0.0125289
Sfi1	0.244523	0.0125427
Magel2	0.216792	0.0125469
Cic	0.105009	0.0126632
Gja4	0.340725	0.0126701
Phb2	0.146542	0.0126834
Cecr2	0.21543	0.0127661
Eif4b	0.099318	0.0127738
Rgs16	0.226563	0.0127891
Psenen	0.226309	0.012832
Grsf1	0.161004	0.0129034
Ndufa3	0.203434	0.012906
Eif3i	0.140778	0.012937
Eno3	0.440042	0.0129375
Ddx54	0.166016	0.0129851
Bcl9	0.124907	0.0129896
Thoc6	0.307264	0.0130049
Immt	0.152614	0.0130193
Rpl37rt	0.23515	0.0131371
Ctbp1	0.0987824	0.0132291
1500035N22Rik	0.780813	0.0132612
Rpl15-ps3	1.36197	0.0132814
Lama2	0.36392	0.0132899
Fmnl2	0.120265	0.0133132
Serinc2	0.201441	0.0133186
Acvr2b	0.225666	0.0133714
Car2	0.355393	0.0133757
Gm14122	1.93675	0.0136216
Bub1b	0.179021	0.0137174
Bub3	0.140738	0.0137278
Lman2	0.14997	0.0137349
Zfp105	0.339777	0.0137376
Ewsr1	0.110628	0.0137474
Rpl35a-ps2	0.538779	0.0137852
Ddx27	0.183476	0.0137994
Gldc	0.196882	0.0138286
Smad4	0.145092	0.0139002
Plekha6	0.156234	0.0139748
Jagn1	0.264297	0.0140346
Top1	0.116948	0.0140519
Eif3l	0.13295	0.0140589
Arf1	0.0986121	0.0140918
Nfia	0.127161	0.0141856
Gm29216	0.7115	0.0142383
Acaca	0.131573	0.0142504
Gimap4	0.797723	0.0142962
Plagl1	0.146981	0.0143687
Usp3	0.151714	0.0144086
Baz1a	0.276392	0.0144673
Enoph1	0.331643	0.0144859
Fst	0.515061	0.0145245
Paf1	0.157971	0.0145863
Chd6	0.123927	0.0146022
Kat14	0.208442	0.014631
Plxnb2	0.107666	0.0146539
Polr1c	0.168683	0.0147506
Hdlbp	0.116814	0.0147687
Tbk1	0.228584	0.0147848
Slc17a7	0.217733	0.0148066
Lonp1	0.14007	0.0148604
Ndufs2	0.124162	0.0148848
Aurkb	0.218732	0.0148855
Ranbp3	0.150365	0.0148967
Ctf1	0.70925	0.0149273
Atp5b	0.0848693	0.0149453
Paip2	0.114195	0.0149544
Hey1	0.231428	0.015018
Hmbox1	0.166526	0.0150573
Arhgap11a	0.151155	0.0150776
Atf4	0.1327	0.0151014
Ftx	0.374862	0.015151
Myt1	0.134003	0.0151736
Msh3	0.253971	0.0151928
Tmem11	0.21712	0.0152095
Gli2	0.261676	0.0152122
Rpl15-ps2	3.33761	0.0152256
Rhpn1	0.325159	0.01524
Zfp660	0.375005	0.015256
Stard4	0.2038	0.0152717
Numb	0.283717	0.0152817
Smc1a	0.112072	0.0153667
Rnaseh2b	0.260805	0.0154547
Stk11	0.122062	0.015493
Dgcr8	0.175102	0.0155474
H2az1	0.114116	0.0156579
Bex3	0.133947	0.0156694
Lrig1	0.220738	0.0156862
Aqr	0.165797	0.0156884
mt-Nd2	0.121805	0.0156893
Coro2b	0.19756	0.0157386
Mapk1ip1l	0.138415	0.0158263
Agap3	0.119409	0.0158474
Tmprss7	0.859874	0.0160217
Lipo2	2.9089	0.0161002
Gm6563	0.227945	0.016165
Gm5805	0.480889	0.0161958
Brpf1	0.164005	0.0162642
Kdm3a	0.152434	0.0162844
Ndufa2	0.199894	0.01629
Snx17	0.145914	0.0163045
Spag7	0.177445	0.0163632
Spindoc	0.186239	0.0163803
Rps25	0.105775	0.0164122
Plcg1	0.102599	0.0165303
Gm3667	0.950344	0.0165491
F2r	0.185348	0.0165869
Narf	0.133369	0.0166066
Ccdc85c	0.15133	0.0166302
Brd1	0.125666	0.0166987
Canx	0.110991	0.0167017
Zbtb22	0.204035	0.0167349
Hbb-bs	0.121424	0.0167427
Rnf145	0.123703	0.0167589
Fgfr2	0.164117	0.0168225
Igf2r	0.157782	0.0169009
Clec7a	1.96764	0.0169374
Ftsj3	0.165209	0.0169476
Gpr55	1.36426	0.0169844
Clptm1	0.139131	0.0170653
Hmga1	0.149977	0.0170737
Bop1	0.157817	0.0171091
Frmd8	0.27226	0.0171984
Mapk6	0.115198	0.0172244
Zfp469	0.748263	0.0172978
Safb	0.103524	0.0173768
Ift122	0.20208	0.0174035
Zfp553	0.152155	0.0174166
Polr3d	0.215166	0.0174306
Atf6b	0.14537	0.017542
Afap1l1	0.392518	0.017565
Sox1	0.158553	0.0176527
Dhx15	0.104499	0.0176855
Larp7	0.186419	0.0177692
Rpl9-ps4	0.336375	0.0178412
Cops4	0.147563	0.017867
Sox13	0.264564	0.0178816
Pa2g4	0.110815	0.0179138
ENSMUSG00000120732	0.200472	0.0179368
Brd4	0.110062	0.0180205
Ifi44	2.05117	0.0182313
Ccdc61	0.307778	0.0183304
Peli2	0.194963	0.0183918
Aifm1	0.179571	0.0184062
Sox6	0.153879	0.0184372
Coq7	0.246054	0.018521
Eif3c	0.119876	0.0187065
Scrt2	0.135499	0.0188024
Fignl1	0.3122	0.0188094
Clint1	0.143129	0.018888
Gm37460	1.37229	0.0189388
Pds5b	0.132323	0.0189905
Mrpl45	0.219511	0.0190777
Mllt6	0.134872	0.0190965
Rgp1	0.172782	0.0191302
mt-Nd6	0.138476	0.0192033
Cenpf	0.162912	0.019288
Siah3	0.252316	0.019407
Lrrc59	0.11768	0.0194933
Zmpste24	0.233322	0.019519
Trip6	0.268243	0.0196342
Map3k4	0.165144	0.0198513
Mdm4	0.136362	0.0200162
Dlst	0.123536	0.0201058
Wdr82	0.0994128	0.0201153
Rab10os	0.223386	0.0201325
Ctnna2	0.106112	0.0201473
Gm9967	0.855863	0.020159
Cbl	0.147782	0.0201953
Nrros	0.460609	0.0201983
Sinhcaf	0.199355	0.0202167
Calu	0.1148	0.0202785
Ubr4	0.287227	0.0203922
Por	0.138884	0.020393
Szt2	0.159721	0.0203963
Stom	0.442369	0.0204555
Jmjd6	0.169953	0.0205062
Anapc2	0.112899	0.0205172
Sp1	0.168607	0.0206602
Msrb3	0.452785	0.0207011
Lrp10	0.199037	0.0207313
Pafah1b3	0.116511	0.0207525
Tcf12	0.104192	0.0207537
Gm43860	0.650559	0.020874
Fat4	0.30191	0.0208949
Gmeb2	0.194112	0.0209062
Dll4	0.393645	0.0209116
Rps16-ps2	0.192731	0.0209319
9630028B13Rik	0.482045	0.020968
Bora	0.336277	0.0209745
Bbs2	0.316489	0.0213148
Eif4e2	0.132543	0.0213163
Ccdc8	0.222514	0.0213252
Fkbp4	0.110032	0.0213413
Git1	0.12701	0.021448
Mpp3	0.203374	0.02149
Rnf5	0.159632	0.0215048
Tmem97	0.303567	0.0215215
Ints4	0.172728	0.0215289
Gm38228	1.34618	0.0215496
Ubr5	0.115783	0.0216113
Pcid2	0.186635	0.0216195
Ehmt1	0.132716	0.0216288
Rabl2	0.261199	0.0217134
Nol12	0.246481	0.0217207
Gm6793	0.094693	0.0217392
Creb5	0.298219	0.0217541
Cbfa2t2	0.144667	0.0218265
Uqcrh	0.14955	0.02188
Zfp526	0.322737	0.0218889
Kif21b	0.0855358	0.0219961
Anapc5	0.0921503	0.0221427
Htatsf1	0.119099	0.0221948
Clic1	0.189184	0.02221
Pabpc1	0.0817131	0.0222285
Patz1	0.13559	0.0222778
Lrrc8a	0.343981	0.0223341
Akap9	0.136149	0.0223669
Gm15387	0.961674	0.0223894
R3hdm2	0.108575	0.0223988
Mid1	1.2025	0.0224095
Bcl7a	0.100534	0.0224156
Smarce1	0.096256	0.0224325
Clasp1	0.111821	0.0224436
Prdm15	0.193306	0.0224629
Arhgap35	0.114611	0.0224841
St18	0.208442	0.0225846
Ifrd2	0.37673	0.0227654
Larp1	0.110611	0.0227911
Svil	0.196014	0.0228468
Caprin1	0.0804316	0.0228501
Eprs	0.110449	0.0228859
Nrf1	0.168668	0.0229824
Nacc1	0.129764	0.0231256
Eed	0.196306	0.0231308
Srp68	0.141989	0.0231735
Imp4	0.186335	0.0231808
Kif4	0.216572	0.0233414
Ptgfrn	0.14002	0.0233922
Msantd3	0.176083	0.0234382
Prpf3	0.190841	0.0234547
Trmt61a	0.305747	0.0234841
Dbx1	0.495707	0.0234884
Gm9493	0.277657	0.0234981
Nid1	0.138904	0.0235036
Pgpep1	0.165083	0.0235079
Gm4332	0.25577	0.0235166
Dcps	0.224666	0.0235221
Ahsa1	0.131958	0.0235847
Gm13135	0.692362	0.0235977
Rere	0.119498	0.0236555
Pxylp1	0.195867	0.0237073
Ctcf	0.10772	0.0237121
Gm20546	4.36361	0.0237465
Tes3-ps	1.16664	0.0238077
Csmd1	0.304119	0.0238476
Adsl	0.191196	0.023938
Gm10320	4.24704	0.0239412
Anp32a	0.0967586	0.0239617
Igfbp4	0.119378	0.0240825
Usp19	0.100031	0.0240854
Yeats4	0.135105	0.0241268
Dcakd	0.122176	0.0241431
Sigmar1	0.225285	0.0241503
Col8a2	0.440163	0.0241785
Steap1	1.52325	0.024194
Rbm17	0.12194	0.0242046
Ercc1	0.31089	0.0243198
Cux1	0.122494	0.0243286
Acss1	0.165542	0.0243374
Zfp90	0.175683	0.024412
Timeless	0.182252	0.0244152
Ddost	0.127603	0.0244489
Wdr33	0.130756	0.0246486
Actn4	0.127233	0.0246768
Robo3	0.351326	0.0248224
Qser1	0.167377	0.024862
Pkd1	0.151739	0.0249169
mt-Tn	0.768675	0.024943
Stard9	0.261421	0.0249472
Tpr	0.118223	0.0250075
Sephs1	0.112798	0.0250271
Cdt1	0.260529	0.0250441
Rtcb	0.12183	0.0250844
Zbtb40	0.237686	0.0251413
Gm2058	0.732752	0.0251463
Mia2	0.214929	0.0251615
Taf5l	0.203363	0.0253736
Abl1	0.106464	0.0254185
Mpdz	0.574663	0.0254358
Arvcf	0.117145	0.025533
AU020206	0.343582	0.0255502
Gse1	0.123669	0.0256287
Fam162a	0.251929	0.0256355
Nomo1	0.141524	0.0256771
Hspd1	0.101188	0.0256882
AK157302	2.82359	0.0257018
Pou3f4	0.202431	0.0257327
Gm15945	3.23718	0.0258351
Ppm1f	0.153156	0.0258382
Ripor2	0.173308	0.0259351
Chmp3	0.163859	0.02595
Unc93a2	4.32274	0.0260389
Pom121	0.124657	0.026234
Elp2	0.104794	0.0262616
Nkain3	0.329956	0.0263709
Phrf1	0.11859	0.0264126
Emsy	0.13681	0.026476
Slc25a10	0.277401	0.0265111
Ddx19a	0.159742	0.0266102
Rpl17-ps3	0.153663	0.026626
Gm3788	0.360892	0.0266348
Twist1	0.604214	0.0266529
Mettl14	0.174473	0.026683
Ipo9	0.0927924	0.0266937
Acsl3	0.169523	0.0268093
Ddit3	0.328744	0.0268621
Kcna3	0.540527	0.0269113
Cope	0.161036	0.0270827
Gm43201	4.29499	0.0270847
Rassf4	0.307942	0.0271116
Smg1	0.140012	0.027223
Tacc1	0.394634	0.0272763
Clic4	0.104071	0.0272891
Surf4	0.12838	0.0272936
Pou6f1	0.115207	0.027295
Samd4b	0.134572	0.0272951
Erbb2	0.260017	0.0275872
Fem1b	0.098744	0.0276309
Cstf1	0.175914	0.0277365
Wwtr1	0.158661	0.027774
Wdr5	0.145941	0.0279022
Lmx1a	0.373107	0.0279654
Ipo7	0.10495	0.0279687
Cbfa2t3	0.169524	0.0279822
Ip6k1	0.0999948	0.0280589
Gm15497	1.89547	0.0280712
Kat6a	0.116739	0.0281421
Jpx	0.3417	0.0282097
Cops7a	0.181628	0.0282627
Gm35040	0.142429	0.0283151
Ss18	0.141078	0.0283418
Kdm7a	0.179981	0.0283954
Smn1	0.210884	0.0284768
Atp6v1f	0.147657	0.0285967
Dbn1	0.0823716	0.0286308
Prep	0.137481	0.0286739
Gm4950	0.733917	0.0287226
Luzp1	0.185825	0.0289547
Mier3	0.20945	0.0293251
Ephb2	0.120258	0.0294486
Gprc5b	0.181536	0.0295003
Stoml2	0.159107	0.0295084
Pdcd11	0.14636	0.0295384
Psmb6	0.115038	0.0296473
Psph	0.280386	0.0298263
Surf6	0.188156	0.0299008
Lrrc14	0.202325	0.0299874
Ube2g2	0.15951	0.0300526
Hs2st1	0.116019	0.0300765
Abcf1	0.117988	0.0301359
Cyb5b	0.114233	0.030143
Fryl	0.150987	0.0303402
Mtcl1	0.146696	0.0304209
Zfp688	0.357436	0.0304439
AI662270	2.23985	0.0305032
Ap1m1	0.112622	0.030551
Htt	0.144457	0.0306966
Acot13	0.367868	0.0307007
Tln1	0.130354	0.0307186
Rnf40	0.119626	0.0308029
Bysl	0.225132	0.0309864
Mettl1	0.333431	0.031177
Cdc34	0.184281	0.031198
Parp14	0.897623	0.0312186
Arid2	0.112471	0.0312408
Sorcs2	0.19927	0.031253
Gm50050	1.97488	0.0312761
Nfya	0.144281	0.0313373
Srm	0.159561	0.0314072
Emx2	0.195234	0.0318919
Cdc16	0.120995	0.0319707
Crk	0.097318	0.032002
Gm7846	0.582381	0.0320046
Gm42894	1.51226	0.0321502
Gm44995	4.1903	0.032173
Ndufb7	0.162271	0.0322379
Nudc	0.114484	0.0322518
Pgd	0.112077	0.0322825
Dusp5	0.858291	0.0323093
Anapc1	0.104542	0.0323327
Pum3	0.138768	0.0323867
Ncln	0.144969	0.0324025
Tmem108	0.206155	0.0324117
Usp36	0.175726	0.0325396
Srsf9	0.150816	0.0326067
Gm8807	4.36476	0.0326451
Gm44916	4.36476	0.0326451
Ppil4	0.14376	0.032653
Gtf3c5	0.168741	0.0326918
Zfp446	0.291592	0.0327914
Mroh2a	0.262053	0.0328195
Fat2	0.924684	0.0328237
Fxyd5	0.51832	0.032901
Dmrta1	0.586731	0.0329251
Rrp15	0.233479	0.03297
St13	0.0947291	0.0330379
Adipor2	0.128403	0.0330547
Natd1	0.138556	0.0330639
Huwe1	0.232038	0.0330728
Ppp4c	0.12672	0.033091
Slc13a4	0.378418	0.033212
Ninl	0.202646	0.0334274
Fbxl22	0.557159	0.0334422
Sf3a3	0.139607	0.0334877
Patj	0.281128	0.0336295
Rxrb	0.146857	0.0336428
Rnf213	0.436676	0.0336913
Ifih1	0.977691	0.033776
Socs6	0.197314	0.0339631
Cap1	0.0995106	0.0342417
Cars	0.153564	0.0342842
Gm3635	4.22057	0.0343977
Safb2	0.131211	0.0344132
Per2	0.267136	0.0344205
Lrp2	0.439107	0.0344847
Map2k1	0.180972	0.0345233
Sox2	0.109605	0.0345273
Ist1	0.114582	0.0346809
BC028777	3.70897	0.034735
Zfp292	0.126859	0.0348476
Gm42743	0.915283	0.0348536
Piezo2	0.399181	0.0349527
Ankmy1	1.60403	0.0349632
Stra6	0.263873	0.0350121
Med8	0.203972	0.0350942
Gm10275	0.179514	0.0353329
Cdk9	0.141265	0.0353793
Sdc1	0.188984	0.0354106
Grwd1	0.225311	0.0354734
Gm16223	4.1601	0.0356392
Oxa1l	0.142693	0.0357757
Akna	0.214726	0.0360912
Megf10	0.187041	0.036191
C130071C03Rik	0.110018	0.0362645
Pimreg	0.181658	0.0363199
Tnfrsf19	0.135615	0.0363779
Sparc	0.0962445	0.0363865
H1f3	1.70978	0.0363943
Fzd3	0.115902	0.0364343
Iglon5	0.141548	0.0365266
Cct7	0.0898574	0.0365458
Gm21742	8.16914	0.0366151
Pin1	0.153101	0.0366543
Srrm4	0.10556	0.0366747
Gm7862	0.979182	0.0368633
Srek1	0.125717	0.0368953
Aff1	0.298087	0.0369956
Ctsa	0.149341	0.037202
Pramel12	0.247951	0.0373424
Itgax	1.97425	0.0374006
Cartpt	1.04347	0.0374332
Nasp	0.095164	0.0374992
Chtop	0.0967871	0.0375755
Rem2	0.27412	0.0377762
Mir1258	3.6174	0.0378071
Fcf1	0.224341	0.0378092
Dubr	0.210933	0.0378297
Dot1l	0.119095	0.0378497
5730405O15Rik	0.978394	0.0378814
Bcl2l1	0.118416	0.0379693
Qars	0.130727	0.0380132
Tmsb10	0.0784396	0.038036
Gm7729	0.728997	0.038084
Golga5	0.198104	0.0381852
Plk3	0.32565	0.0382474
Psme3	0.114101	0.038249
Zfyve26	0.223022	0.0382896
Nelfcd	0.135738	0.0384284
Ndufs8	0.189782	0.0384417
Zfp260	0.135229	0.0384791
Axin1	0.146695	0.0385534
Srsf10	0.100196	0.0385838
Zc3hav1	0.654906	0.0386075
Hpgds	0.424356	0.0386513
Btg3	0.361671	0.0387169
Maml1	0.181213	0.0387265
Gm2395	4.14458	0.0387281
Gm26826	4.14458	0.0387286
Rpain	0.28976	0.0387743
Macroh2a2	0.096703	0.038796
Copz1	0.120044	0.0388746
Cthrc1	0.378197	0.0390056
Gm27027	2.04016	0.0390664
Fam193a	0.135248	0.0391164
Tra2a	0.100991	0.039139
Epcam	0.896534	0.0391635
Rfx1	0.176569	0.0391911
Coa4	0.410722	0.0392354
Isg20l2	0.161533	0.039284
Nip7	0.173858	0.0392936
Aars	0.107685	0.0393377
Ncoa1	0.128589	0.0394095
Gm47483	0.824705	0.0394471
Pou3f2	0.125957	0.0394532
Tbc1d9b	0.137237	0.03956
Pank2	0.161955	0.0396305
Pfdn2	0.114302	0.0396469
E2f2	0.288609	0.0397352
Cacul1	0.15535	0.039791
Prss12	0.581932	0.0398726
Mipep	0.211481	0.0400918
Lin37	0.26873	0.0402074
Atp8b4	4.14445	0.0403364
A730056A06Rik	0.577999	0.0404632
Cited2	0.119202	0.0404732
Leng1	0.326336	0.0405308
Plau	0.659286	0.0405924
Sf1	0.0814457	0.0406632
Kif27	0.419163	0.0412212
Nudt9	0.20916	0.041304
Wnt7b	0.102472	0.0413601
Erh	0.108934	0.0413922
Pomt2	0.202526	0.0413947
Nop58	0.125104	0.0414071
Sfpq	0.0753185	0.0414193
Pcyt2	0.142296	0.0414611
Hdgfl2	0.111568	0.0414651
9230112E08Rik	0.381582	0.0416342
C2cd3	0.149662	0.041798
Adamts5	0.347866	0.0418399
Phf21a	0.113377	0.0420259
Tpgs1	0.189654	0.0421565
Nfe2l1	0.0974578	0.0421586
Elac2	0.164527	0.042186
Sun2	0.122359	0.0422451
Aip	0.168755	0.0424669
Ddx24	0.122697	0.0425104
Ndufb10	0.161215	0.0425154
Kdm2a	0.103811	0.0425721
Gm49933	2.24127	0.0427129
Kif1c	0.153268	0.0427579
Polr1b	0.184091	0.0428311
Exoc4	0.118712	0.0429305
Slc38a10	0.108627	0.042966
Pacsin2	0.169411	0.0429819
Qk	0.098173	0.0429847
Rtl1	0.426985	0.0430144
Ccdc9	0.164399	0.0430972
Zfp467	0.189562	0.0431764
Wtip	0.248853	0.0431875
Gata1	2.03261	0.0432333
Ldhb-ps	0.340923	0.0432523
Irf7	0.856467	0.0432671
Enah	0.0823493	0.0432839
Ivns1abp	0.0893163	0.0433029
Slc22a6	0.298888	0.0433103
Smarcc2	0.0708433	0.0433589
Gm11627	0.592546	0.0435394
Rbm38	0.251035	0.0436476
Rhd	1.07345	0.043689
Eif5b	0.131448	0.0436896
Ino80c	0.228829	0.0438042
Tmem109	0.222924	0.0438413
Saraf	0.162458	0.0439118
Nmrk2	4.14419	0.0441494
Alas1	0.173761	0.0442722
Smcr8	0.186311	0.0443688
Acvrl1	0.317698	0.0444374
Celsr3	0.0956754	0.0444678
Nek5	1.16016	0.0444811
Gm3571	0.386617	0.0445366
Gm15726	1.29246	0.0445534
Gm21168	2.41875	0.0445855
Scrib	0.109345	0.0446405
Zcchc14	0.0944629	0.0447247
Gm28661	0.301948	0.0447303
Amotl2	0.143827	0.0448446
Pak1ip1	0.168136	0.0450869
Mrpl2	0.187721	0.0451243
Idh1	0.0826174	0.0451567
Zfp566	0.372376	0.0451909
Alpl	0.366631	0.0451912
Kctd12b	0.374248	0.0453639
Tdg	0.175581	0.0455132
Wdr89	0.521867	0.0455153
Timm22	0.184196	0.0456171
Adgre1	0.46027	0.0456828
Gm17415	3.04456	0.0457034
Rock2	0.12494	0.0457238
Cxxc1	0.132431	0.0459894
Apex2	0.287848	0.0460096
Hmgb1-ps7	2.48425	0.046063
Nog	0.297467	0.046084
Vgll4	0.158821	0.0461611
Gm6542	0.571399	0.0464067
Pmpca	0.117096	0.0464726
Dync1h1	0.244374	0.0465817
Gm12516	3.60569	0.0466099
Gm49083	2.38867	0.0468291
Ccl6	1.24483	0.0469409
Dazap2	0.110615	0.0469907
Clca2	2.5474	0.0470501
Pigu	0.204972	0.0470786
Adrb2	1.17693	0.04724
Gabre	0.683545	0.0472424
Isg15	1.14695	0.0473152
Rbm45	0.15104	0.0474127
Gm5417	0.457135	0.0474189
Dysf	0.416204	0.0474915
Idh2	0.120219	0.0475332
Gm43457	0.569566	0.0475582
Bmpr1b	0.30481	0.0475669
Irf9	0.244786	0.0480283
Atad3aos	1.50387	0.0480371
ENSMUSG00000120792	4.011	0.0481019
Eif2b2	0.152929	0.0481584
Gm8991	0.204319	0.0482092
Lgals9	0.479071	0.0482708
Elf2	0.111657	0.0483628
Rb1	0.119845	0.0484197
Atg4d	0.20033	0.04849
Rad52	0.259022	0.0486167
Pdxdc1	0.129487	0.0487641
Usf3	0.136254	0.0488368
Prmt5	0.117556	0.0489436
Slc25a37	0.256912	0.048989
Ttyh1	0.109808	0.0490349
Rxfp2	2.15926	0.0491026
Cactin	0.146333	0.0491175
Gm3764	0.122964	0.0491228
Uggt1	0.120185	0.049345
Rnf7	0.129024	0.0494744
Gm7367	0.27422	0.0494788
Ccnb2	0.217331	0.0495302
Xrcc1	0.151901	0.0495411
mt-Tc	0.490988	0.0495502
Mta1	0.0949531	0.049578
Slc47a1	4.02798	0.0496285
Nvl	0.145844	0.0497597
Creld2	0.194227	0.0497891
Med22	0.120582	0.0498029
Ddx39b	0.0855888	0.0498205
Irf3	0.177611	0.0498215

## Sheet: Supplementary Table 2
Table of differentially expressed genes from mouse exon array of VPA vs. Control forebrain culture (FC>1.5)
		p-value		average					p-value		average
Gene Id	Gene Symbol	p (Corr) ([VPA] Vs [Control])	p ([VPA] Vs [Control])	FC	Regulation		Gene Id	Gene Symbol	p (Corr) ([VPA] Vs [Control])	p ([VPA] Vs [Control])	FC	Regulation
24113	Vax2	0.0144848	0.00359396	10.6193	up		22353	Vip	0.0237366	0.0130283	5.15866	down
12022	Barx1	0.00750598	0.000966688	8.07876	up		18205	Ntf3	0.0202137	0.0107329	4.32329	down
98965	AI448005	0.0120827	0.00263457	7.3343	up		68169	Ndnf	0.0183089	0.00638114	2.82034	down
209448	Hoxc10	0.0255234	0.0158108	6.44404	up		242443	Grin3a	0.00433775	6.94947e-05	2.63908	down
14268	Fn1	0.00967838	0.00160094	3.9398	up		20604	Sst	0.0183089	0.00671719	2.53524	down
21333	Tac1	0.0414579	0.0367822	3.51803	up		67405	Nts	0.0425745	0.0387332	2.51153	down
15371	Hmx1	0.0189398	0.00863425	3.24661	up		72902	Spock3	0.0313509	0.0235721	2.42777	down
73429	1700109F18Rik	0.00750598	0.000885385	2.80517	up		53870	Cntn6	0.0255234	0.0160752	2.42471	down
15426	Hoxc8	0.0335302	0.0269754	2.73986	up		19699	Reln	0.0331726	0.0256901	2.42398	down
100048295	LOC100048295	0.0289894	0.0196579	2.69226	up		54381	Cpq	0.0350956	0.0290264	2.3312	down
21386	Tbx3	0.0320634	0.02459	2.67785	up		15560	Htr2c	0.00501455	0.000452441	2.22583	down
225631	Onecut2	0.0197599	0.00980567	2.55315	up		399604	C530014P21Rik	0.0202137	0.0108397	2.13793	down
104360	Isl2	0.0333175	0.0263033	2.52064	up		13640	Efna5	0.0189398	0.00861831	2.13305	down
75801	4930447C04Rik	0.0183213	0.00738942	2.50996	up		215378	Brinp3	0.00750598	0.000937407	2.07869	down
54713	Fezf2	0.0411611	0.0355904	2.48718	up		100044161	LOC100044161	0.00439872	0.000166967	2.0655	down
226049	Dmrt2	0.0313523	0.0238089	2.47661	up		20346	Sema3a	0.00439872	0.000330731	2.0519	down
12971	Crym	0.0332164	0.0259738	2.45605	up		100039963	Gm2521	0.0132323	0.00305886	2.03297	down
99586	Dpyd	0.0255234	0.01612	2.4501	up		56847	Aldh1a3	0.0459708	0.0428035	2.02865	down
22431	Wt1	0.0311606	0.0231947	2.43059	up		14734	Gpc3	0.0255234	0.0157498	1.9884	down
100046551	Apol7d	0.0289894	0.0193975	2.4189	up		215654	Cdh12	0.0305225	0.0218018	1.9684	down
54135	Lsr	0.015598	0.00398746	2.29472	up		67784	Plxnd1	0.0194314	0.00943259	1.967	down
320145	Sp8	0.0425745	0.0384176	2.25568	up		100046014	LOC100046014	0.00433775	0.00012761	1.96073	down
75426	Igfbpl1	0.0289894	0.0198349	2.22245	up		100040407	Gm2756	0.0348762	0.0283205	1.95724	down
207667	Skor1	0.0183089	0.00702072	2.20775	up		12950	Hapln1	0.0247358	0.0137789	1.95376	down
21825	Thbs1	0.016148	0.0044923	2.17073	up		12307	Calb1	0.0197728	0.00996075	1.94496	down
16842	Lef1	0.0247358	0.0140239	2.15495	up		11600	Angpt1	0.00750598	0.000991243	1.93706	down
640441	LOC640441	0.0118546	0.0022283	2.14597	up		319317	Snhg11	0.0455713	0.0418023	1.91268	down
12509	Cd59a	0.0183089	0.00679089	2.14509	up		14805	Grik1	0.0494075	0.0468071	1.89122	down
233806	Tmem159	0.0247358	0.0141347	2.12255	up		14727	Gp49a	0.0117936	0.0020395	1.88929	down
402723	E130104P22Rik	0.04143	0.0364459	2.07841	up		12362	Casp1	0.0183213	0.00771425	1.8752	down
381350	BC061194	0.0182119	0.006025	2.0761	up		100044207	LOC100044207	0.0183213	0.00771425	1.8752	down
56312	Nupr1	0.0255234	0.0151293	2.05007	up		320712	Abi3bp	0.00750598	0.00106339	1.87204	down
100042814	Gm15456	0.0305061	0.0215607	2.03293	up		14417	Gad2	0.0276593	0.0180929	1.86619	down
54353	Skap2	0.00439872	0.000290435	1.9493	up		14608	Gpr83	0.019803	0.0102737	1.86593	down
14871	Gstt1	0.00433775	5.538e-05	1.9463	up		12023	Barx2	0.0371754	0.0318647	1.86388	down
634417	LOC634417	0.0335302	0.0268335	1.90558	up		12564	Cdh8	0.0183089	0.00692699	1.85038	down
277353	Tcfl5	0.016148	0.00446656	1.90408	up		12565	Cdh9	0.00750598	0.00104939	1.83769	down
67622	Mxra7	0.0255234	0.0156705	1.88928	up		791390	Gm16498	0.0305061	0.021549	1.81618	down
53626	Insm1	0.0491532	0.0461966	1.87564	up		66141	Ifitm3	0.0255234	0.0159114	1.81344	down
11516	Adcyap1	0.0120827	0.00246535	1.86546	up		109648	Npy	0.0350956	0.0292903	1.81008	down
14284	Fosl2	0.0311606	0.0230638	1.86476	up		241514	Zfp804a	0.0305358	0.0220409	1.80153	down
72789	Veph1	0.0350956	0.0290998	1.83679	up		77085	3010027C24Rik	0.0120827	0.00257423	1.78606	down
623172	Gm6403	0.00498673	0.000412436	1.8232	up		320495	Ipcef1	0.0261255	0.0166968	1.7838	down
100048267	LOC100048267	0.0189398	0.00868666	1.80778	up		19418	Rasgrf2	0.0371453	0.0315595	1.78299	down
100040294	Gm2694	0.0459708	0.04286	1.78234	up		94217	Lrp1b	0.0310364	0.0226356	1.77843	down
17304	Mfge8	0.00916989	0.00137893	1.76801	up		17885	Myh8	0.0425745	0.0384976	1.75624	down
73649	Cybrd1	0.0289894	0.0197075	1.76427	up		12671	Chrm3	0.0189398	0.00867669	1.75374	down
629024	Gm6938	0.0182119	0.00578637	1.75362	up		77524	C030017B01Rik	0.0273904	0.0177111	1.75104	down
18996	Pou4f1	0.0183213	0.00717826	1.75019	up		80892	Zfhx4	0.015898	0.00418367	1.74953	down
109594	Lmo1	0.0174916	0.00499761	1.74581	up		383348	Kctd16	0.0182119	0.00557871	1.7294	down
259277	Klk8	0.00433775	0.000130459	1.73468	up		73358	1700054M17Rik	0.0371453	0.0313674	1.72467	down
210741	Kcnk12	0.0305061	0.0211539	1.72856	up		635253	Usp51	0.00439872	0.000279422	1.7135	down
11847	Arg2	0.0175798	0.00515498	1.71509	up		16517	Kcnj16	0.0194314	0.00949657	1.7078	down
78977	Popdc3	0.0120827	0.00247344	1.71359	up		18488	Cntn3	0.04143	0.0364074	1.70104	down
239408	Tmem74	0.00938585	0.00148198	1.70735	up		18012	Neurod1	0.0118546	0.0022132	1.68853	down
67080	1700019D03Rik	0.0185844	0.00796472	1.70603	up		72605	Car10	0.019803	0.0101437	1.68727	down
12404	Cbln1	0.00439872	0.000301399	1.70412	up		100039923	Gm2496	0.0255234	0.0158403	1.68007	down
100046314	LOC100046314	0.00439872	0.000301399	1.70412	up		67951	Tubb6	0.0183213	0.00759813	1.6799	down
20677	Sox4	0.0202137	0.0109428	1.69875	up		18155	Pnoc	0.0194314	0.00932316	1.67336	down
56506	Cib2	0.0189638	0.00884028	1.68146	up		228432	Ano3	0.00750598	0.00107228	1.64696	down
432939	Gm5468	0.0182119	0.00585439	1.64078	up		18761	Prkcq	0.0132323	0.00308422	1.62682	down
71296	4933436C20Rik	0.0144848	0.0035267	1.61597	up		269784	Cntn4	0.0182742	0.00618301	1.59522	down
18025	Nfe2l3	0.0183089	0.00661138	1.59901	up
319582	6430573F11Rik	0.0182119	0.00598895	1.58007	up

## Sheet: Supplementary Table 3
Table of differentially expressed genes from bulk RNA-sequencing of adult brain in Notch1/2 cKO experiment (p-value <0.05)
	Common gene between WT vs. WT-VPA and WT-VPA vs. cKO-VPA
Upregurated genes (WT v.s. WT-VPA)				Downregurated genes (WT-VPA v.s. cKO-VPA)
Gene Symbol	log2FoldChange	p-value		Gene Symbol	log2FoldChange	p-value
Wdfy1	0.604516	2.57949e-10		Mzt1	-1.0299	2.77693e-32
ENSMUSG00000095041	0.407728	2.76116e-10		Gm6145	-0.758267	1.50869e-09
Kcnk9	0.521608	7.68639e-09		Tek	-0.981279	8.60699e-07
mt-Th	1.09144	3.38416e-07		Slc24a2	-0.333421	1.91801e-05
Igfn1	0.840125	9.26497e-07		Lmo3	-0.418911	2.03536e-05
Kcnma1	0.335804	1.10456e-06		Pcdh9	-0.358554	5.09154e-05
Chgb	0.338693	1.45351e-06		Tes3-ps	-2.27297	8.45726e-05
Neat1	0.53027	3.14753e-06		Slc8a1	-0.346632	9.84162e-05
Frmd6	0.576237	3.57958e-06		Gpr161	-0.510819	0.000101953
Per1	0.450508	8.84027e-06		Scn2a	-0.307486	0.000126043
Cep131	0.504941	1.07603e-05		Wdfy1	-0.498782	0.000157703
Gm28439	0.524695	1.67049e-05		Ncam2	-0.354903	0.000197137
Fus	0.306821	1.87686e-05		Ednrb	-0.310732	0.000249594
Kcnj9	0.375509	3.33366e-05		Lnpep	-0.295063	0.000280351
Ddit4	0.468854	3.88054e-05		ENSMUSG00000121171	-2.78434	0.000292986
Nptxr	0.297201	5.12346e-05		Syt1	-0.270059	0.000508947
ENSMUSG00000121171	3.85543	5.18318e-05		Exosc9	-0.447864	0.000574466
Gstp2	2.57146	5.20355e-05		Gm1943	-0.840595	0.000723427
Fos	0.763372	5.36114e-05		Nlgn1	-0.334852	0.000783581
Gpr26	0.299555	5.78315e-05		Cacna2d1	-0.320552	0.000801655
Unc13a	0.292125	7.22182e-05		Opcml	-0.259782	0.00106562
Bhlhe40	0.395941	7.55472e-05		Grin2a	-0.345651	0.00110573
Igsf9b	0.448481	7.82636e-05		Cd47	-0.26578	0.0012612
Nwd2	0.487196	8.0367e-05		Marchf6	-0.229078	0.00132956
Unc13b	0.418643	8.28997e-05		Atp2b1	-0.277359	0.00134302
Unc5d	0.465885	8.43271e-05		Grin2b	-0.31349	0.00135498
Pnn	0.390261	0.000100255		Kcnh7	-0.300757	0.00136251
Kcnh7	0.354189	0.000104226		Hspa12a	-0.267615	0.0014431
Odf2	0.323399	0.000104285		Tfrc	-0.246778	0.00145541
Tmem63b	0.288966	0.000104407		Nrxn1	-0.20878	0.00166165
Tnik	0.267537	0.000114166		Arfgef3	-0.325532	0.00166632
Spaca6	0.556687	0.000120567		Bmpr2	-0.231962	0.00170741
Ldlr	0.526377	0.000128223		Lmbrd2	-0.280874	0.00175895
Pdzrn3	0.460149	0.000133982		Tnfrsf21	-0.294379	0.00180604
Dhcr24	0.279792	0.000137992		Celsr2	-0.229616	0.00182801
Tmem132d	0.427777	0.00013989		Dgke	-0.264435	0.00199638
Mef2c	0.38802	0.000143552		Sorl1	-0.219144	0.00210938
Tril	0.332298	0.00014662		Elavl2	-0.329561	0.00211986
Coro6	0.550855	0.000156812		Megf9	-0.221535	0.00212993
Arhgef1	0.363487	0.0001655		Plppr5	-0.306311	0.00216088
Kcnc1	0.262822	0.000193959		Zdhhc21	-0.296923	0.00232811
Med12	0.461807	0.000219481		Tmx4	-0.230631	0.00270346
Taf15	0.345376	0.000234427		Acsl4	-0.309369	0.00276384
Slc17a7	0.271806	0.000239631		Astn1	-0.214749	0.0027659
Kcnab3	0.358737	0.000247123		Unc5d	-0.355376	0.0028973
Lrrc4	0.282896	0.000249009		Syt4	-0.274332	0.00324959
Rps29	0.293069	0.000257235		9330121K16Rik	-0.411127	0.00324984
Nefm	0.349023	0.000270466		Negr1	-0.219181	0.00328185
Mnt	0.333697	0.000282426		Etv1	-0.261006	0.00356523
Atp8b2	0.29707	0.000285141		Map9	-0.280561	0.00358832
Npnt	0.50294	0.000308436		Pgm2l1	-0.265752	0.0036555
Ly6e	0.254723	0.000341713		Cdc40	-0.318987	0.00382121
Kif21b	0.320858	0.000352532		AI504432	-0.390671	0.00384599
Midn	0.442901	0.000364651		Nucks1	-0.221458	0.00385118
Pcdh1	0.239474	0.000372242		Napb	-0.246546	0.00385362
Tmem145	0.423857	0.000384562		Ascc3	-0.438896	0.00386487
Kdm6b	0.373256	0.000399004		Gm14391	-2.25767	0.00386924
Slc6a17	0.213097	0.000404865		Cep170	-0.297817	0.00389226
Celsr2	0.264843	0.000418086		Rab6a	-0.241126	0.00398738
Zfp512b	0.3759	0.000426159		Prkcg	-0.258832	0.00425858
Herc2	0.248758	0.000435287		Gm10432	-0.636219	0.00430174
Pisd-ps1	0.489261	0.000455643		Cntnap5a	-0.381853	0.00436945
Cers4	0.313586	0.0004989		Tafa1	-0.385417	0.00494104
Vegfa	0.355346	0.000534874		Pja2	-0.263114	0.00495074
3300002P13Rik	0.405376	0.000537442		Ppm1e	-0.280733	0.00498606
Lgi3	0.25196	0.000544445		Lclat1	-0.297105	0.00514078
Zdhhc8	0.321799	0.000608858		Nr3c2	-0.292371	0.00517524
Golgb1	0.269406	0.000627704		Arl15	-0.388144	0.0054627
Ptprk	0.314105	0.000664738		Rabgap1l	-0.239948	0.0054716
Arl4d	0.43455	0.000719592		Spock1	-0.236513	0.00558328
Adam11	0.246958	0.00072358		Tnik	-0.2033	0.00577206
Tnks1bp1	0.312155	0.000734042		Nell1	-0.360643	0.00580111
Gm30177	1.06045	0.000777279		Btbd8	-0.312581	0.00582835
Rasal1	0.267346	0.00078964		Chgb	-0.214744	0.00588686
Olfm2	0.319387	0.000797869		Dpp10	-0.269829	0.00598531
Egr4	0.476513	0.000806021		Kif2a	-0.250569	0.00601662
Slc6a1	0.193805	0.000824685		Fzd3	-0.247982	0.00608142
Laptm5	0.326183	0.000839764		Hcn1	-0.273392	0.00616993
Nanp	2.51078	0.000880436		ENSMUSG00000120976	-0.249879	0.00623536
Tmem132b	0.278183	0.000887847		Dennd5b	-0.317912	0.00628208
Nuak1	0.329156	0.000889801		Map1b	-0.201089	0.0063712
Hnrnpu	0.202484	0.000907326		Lrrc4c	-0.23698	0.00639165
Ccn1	0.70153	0.00092909		Gria2	-0.201268	0.0064379
Mcoln1	0.289776	0.000932525		Creg2	-0.230043	0.00650305
Slc20a1	0.278386	0.000961441		Cnksr2	-0.226749	0.0065117
Ewsr1	0.240884	0.00101816		Kcnk9	-0.229099	0.00653134
Hapln4	0.28072	0.0010519		Atp2a2	-0.18536	0.00660829
Dync1h1	0.198512	0.00105246		Gabbr2	-0.187177	0.00679872
Nrn1	0.277478	0.00110514		Gabrb2	-0.323651	0.00714415
Myh9	0.296633	0.00113301		Rasgrf1	-0.1836	0.0072449
Akap8	0.350746	0.00116493		Sel1l	-0.208973	0.00735187
Pnisr	0.335404	0.00117323		Gnaq	-0.196499	0.00737331
Rnf112	0.297346	0.00117383		Met	-0.557149	0.0074443
Hdac7	0.36879	0.00120559		Peg3	-0.184738	0.00748177
Kcnc3	0.284038	0.00127267		Mapk10	-0.216512	0.00756072
Adcy6	0.337455	0.00127384		Clcn3	-0.176521	0.00768392
Syne1	0.206599	0.00128406		Dnm1l	-0.215576	0.00786895
Cirbp	0.274296	0.0013077		Foxred2	-0.352141	0.00788599
Inha	0.459046	0.00133719		Kcnc2	-0.236167	0.00798863
Ncan	0.230156	0.00134302		Sgip1	-0.217861	0.00830568
Edc4	0.296296	0.00135178		Mbnl2	-0.204627	0.00832518
Gm31166	0.53782	0.00135302		Fam169a	-0.259452	0.0084545
Rtl1	0.689896	0.00135554		Map2k4	-0.205436	0.00856617
Extl3	0.229103	0.00137143		Pls3	-0.242253	0.00872318
Nrbp2	0.315773	0.00139039		Rlf	-0.285567	0.00874159
Gm17853	5.09492	0.0014896		Vcpip1	-0.259784	0.00880203
Acvr1b	0.221399	0.00151871		Glg1	-0.204031	0.00885902
A830036E02Rik	0.432603	0.00153476		Dock4	-0.271716	0.00888896
Scamp2	0.394091	0.00153532		Efnb2	-0.246193	0.00907656
Lrp1	0.20293	0.00154383		Gabrb3	-0.19558	0.0091379
Ddi2	0.309334	0.00156296		Pafah1b1	-0.186282	0.00918804
Clasrp	0.369007	0.0016261		Olfml3	-0.38682	0.00929404
Dynll2	0.196684	0.00164059		Cyp2g1	-2.98403	0.00929547
Scube1	0.389815	0.00164149		Sp4	-0.389653	0.00929616
Mfsd4a	0.327418	0.00165291		Cdkl5	-0.229787	0.00930117
Krba1	0.333124	0.00165533		Akap5	-0.253503	0.00940142
Cyth4	0.411689	0.00165821		Rnf128	-0.404715	0.0095328
Atp6v0a1	0.188259	0.0016723		Epha4	-0.253056	0.00962659
Lrrc45	0.442135	0.00170856		Prepl	-0.251063	0.00980167
Tmem240	0.317796	0.0017364		Frrs1l	-0.16802	0.00986749
Ryr2	0.241195	0.00177223		Tmem178b	-0.22201	0.00987701
Cacna1g	0.290608	0.00177286		Pde1a	-0.228	0.0100243
Kmt2b	0.284257	0.00184409		Grm5	-0.21684	0.0100254
Sort1	0.20869	0.0018704		Sez6l	-0.211246	0.0101667
Cckbr	0.295451	0.00190437		Neto1	-0.217516	0.0103707
Pcgf2	0.396263	0.0019057		Tagap	-0.939615	0.0105033
Slc7a8	0.282841	0.00199826		Cpeb4	-0.215414	0.0107697
Kcna2	0.209992	0.00199883		Hsd17b7	-0.302818	0.0107763
Car10	0.278656	0.00203875		Raph1	-0.285465	0.0109161
B4galnt4	0.297171	0.00204602		Sorcs3	-0.351634	0.0111994
Atn1	0.318878	0.00205438		Fbxw7	-0.178777	0.0112107
Ephb3	0.404987	0.00206244		Tmod2	-0.171847	0.0112994
Gabbr2	0.236963	0.00209821		Zfp871	-0.217473	0.0113013
Ftsj3	0.339241	0.00210275		Gdap1	-0.233156	0.0116003
Slc30a10	0.404112	0.00211721		Gm27206	-3.95385	0.011753
Hkdc1	0.472965	0.00218019		Camk1d	-0.192404	0.0121546
Ltk	0.434463	0.00222824		Actr2	-0.196961	0.0122719
Iffo2	0.418644	0.00225242		Adgrl2	-0.215619	0.0123718
Herc1	0.208465	0.00228103		Ncoa1	-0.199656	0.0124489
R3hdm1	0.272124	0.00231945		Mtdh	-0.194321	0.0124496
Grin1os	0.634897	0.00233323		Cnr1	-0.231826	0.0125631
Kcnh1	0.292529	0.00237508		Gda	-0.228662	0.0125744
Acin1	0.284706	0.00239287		D430041D05Rik	-0.23671	0.0126193
Chpf2	0.366801	0.00239593		Gm5124	-0.381167	0.0126502
Ildr2	0.271236	0.00241412		Cadm2	-0.196843	0.0126515
Lama3	0.694128	0.00243051		Gm42205	-4.60182	0.0126983
Nlgn2	0.197714	0.00248972		Rlim	-0.264837	0.012769
Plekhg5	0.249563	0.0025206		Gm44509	-0.279875	0.012769
Hspa12a	0.252712	0.00252248		Bod1l	-0.258661	0.0128554
Nr4a3	0.34255	0.00259837		Slc7a1	-0.275379	0.0129258
Cercam	0.63638	0.00262771		Kcnc1	-0.192353	0.0130409
Foxred2	0.425281	0.0026842		2610021A01Rik	-0.338206	0.0131014
Kcnb1	0.222844	0.00269259		Rif1	-0.312951	0.0131469
Faah	0.270363	0.0027432		ENSMUSG00002076173	-0.603396	0.0133021
Cd34	0.334962	0.0027738		Rtn3	-0.167158	0.013356
mt-Ts2	0.688515	0.00279713		Plxna4	-0.224226	0.0134471
Nr1d1	0.253132	0.00286904		Gria3	-0.176502	0.0135282
Ank2	0.18963	0.00293793		Mfsd14b	-0.226603	0.013529
Snapc4	0.427862	0.00296854		Bclaf1	-0.193856	0.013576
Sidt1	0.338162	0.00299103		Arhgap32	-0.179357	0.0137239
Grin2b	0.283498	0.00299144		Prr14l	-0.247622	0.0137944
Fstl4	0.4961	0.00304093		Nuak1	-0.207179	0.0140106
Rassf3	0.346451	0.00305596		Chl1	-0.260536	0.0144601
Rtel1	0.489976	0.00317198		Zfp748	-0.390957	0.0144637
Slc7a1	0.314608	0.00319432		Amph	-0.188331	0.014521
Zfyve27	0.279916	0.0032006		Braf	-0.212773	0.0146228
Srsf5	0.252694	0.00330865		Utp20	-0.343983	0.0151822
Fjx1	0.221137	0.0033965		Dclk1	-0.151587	0.0153536
Cntnap5a	0.402708	0.0034479		Samd8	-0.214316	0.015498
Slc6a13	0.500916	0.00344949		Kcnq5	-0.205663	0.0155007
Atp1b2	0.200373	0.0034512		Plxnc1	-0.234105	0.0155597
Gm14391	2.32503	0.00345279		Atrx	-0.193065	0.0156376
Gm10184	1.95342	0.00354593		Hspa4l	-0.212623	0.0156391
Col4a1	0.328162	0.00361437		Myo9a	-0.206295	0.0157627
Tmem178b	0.236037	0.00378367		Klhl28	-0.316619	0.0158236
Syngr1	0.175331	0.00378367		Acvr1b	-0.174775	0.0160058
Nfkbia	0.419658	0.00383972		Synj1	-0.195267	0.0160963
Dennd6b	0.357544	0.00385227		Arl5b	-0.319041	0.016185
Erf	0.309944	0.00386405		Dgkg	-0.37005	0.0162543
Hk1	0.180005	0.00388856		Kcnma1	-0.178911	0.016329
S1pr1	0.215125	0.00388859		Man1a	-0.281334	0.0163348
Cspg5	0.210898	0.00389939		Pdgfra	-0.233162	0.016429
Grm2	0.315449	0.00390231		Gabra2	-0.223387	0.016646
Slc2a8	0.386613	0.00390759		Ttll7	-0.179609	0.0166496
Ankrd33b	0.240415	0.0039341		Ubash3b	-0.251388	0.0168698
Hook2	0.452652	0.0039419		Mef2c	-0.234859	0.0169696
Kcnj16	0.277169	0.00396766		Gm6089	-1.1264	0.0169884
Slc27a1	0.229912	0.00398669		Dcp2	-0.221307	0.017032
Plec	0.305449	0.00400805		Vps13d	-0.201639	0.0170481
Vamp1	0.208174	0.00405017		Prkacb	-0.178084	0.0171112
Spock2	0.184666	0.00407717		Micu3	-0.197163	0.0172426
Flt3	0.68388	0.00410154		Gabra1	-0.228805	0.0172478
Ggnbp1	1.07162	0.00410675		Neurod6	-0.30838	0.0174253
Sptan1	0.1754	0.00412318		Xylt1	-0.226567	0.0176673
Cadm1	0.200982	0.00415099		Sprn	-0.178096	0.0177196
Rbm5	0.271846	0.0041512		Tenm1	-0.377983	0.017968
Tafa1	0.344405	0.00417469		Cacnb4	-0.194761	0.0179828
Sun1	0.245249	0.00421643		Zfp398	-0.332259	0.0180617
Car4	0.312905	0.00427452		Gm2115	-0.288627	0.0180729
Nrxn2	0.164061	0.00428372		Fgf9	-0.362055	0.0181497
Chd5	0.216474	0.00432113		7SK	-4.32812	0.0183637
Cchcr1	0.541621	0.00434671		Wdr37	-0.213967	0.0183885
Cacna1d	0.312208	0.00435079		Nrxn3	-0.193479	0.0184947
Muc3a	0.629764	0.00441486		Aff4	-0.190129	0.0187085
Clcn6	0.230301	0.00442907		Luzp1	-0.208256	0.0188369
Espn	0.490324	0.00444864		Scn8a	-0.161439	0.0190546
ENSMUSG00000121080	0.65432	0.00445209		Golm2	-0.190676	0.0191741
C78859	0.454983	0.00445768		B3galt1	-0.236861	0.0193572
Clstn1	0.211017	0.00449755		Fut9	-0.18838	0.0193795
Mical3	0.247906	0.00451108		Ttc39b	-0.248735	0.0194055
Gm4949	0.716163	0.00456941		Cadm1	-0.188798	0.0195253
Cadm3	0.206321	0.00457649		Dnajb14	-0.187645	0.0196663
Rpl17	0.563188	0.00466675		Camsap2	-0.197756	0.0198567
Scn8a	0.231236	0.00468044		Adam22	-0.159691	0.0199411
1700016P03Rik	0.5789	0.0047491		Cacnb2	-0.278549	0.020488
Slc6a7	0.271258	0.0047891		Trhr	-0.61412	0.0205661
Tshz3	0.392043	0.00480941		Wasf1	-0.23384	0.0211206
Gm3294	0.753582	0.00485416		Acap2	-0.180772	0.0213976
Scn2a	0.209416	0.0048645		Atp8a2	-0.255104	0.0214223
Cpsf4	0.389461	0.0049646		Sdk1	-0.416202	0.0214479
Gm6089	1.15915	0.0050319		Nexmif	-0.32205	0.0217043
Rasgrf1	0.183581	0.00510028		Tet1	-0.435417	0.0218374
Dennd3	0.638808	0.00514234		Gm45338	-1.17545	0.022052
Mast1	0.268799	0.00515191		Gabrb1	-0.18145	0.0220695
Snord3b-ps2	4.32363	0.00521933		Gm16070	-3.30188	0.0221674
Sema4g	0.33608	0.0053005		Dkk3	-0.140482	0.02224
Ppm1l	0.223594	0.0053364		Vldlr	-0.195925	0.0222685
Safb	0.222432	0.00535158		Sv2a	-0.196382	0.0223877
Wdr81	0.316893	0.00535173		Prickle1	-0.204749	0.0228643
Ciz1	0.305691	0.00542119		1700087I21Rik	-0.513901	0.0229313
Tmem245	0.242065	0.00545359		Slitrk1	-0.245137	0.0230239
Rasgrf2	0.271311	0.00549345		Gpsm2	-0.331219	0.0235709
Lclat1	0.289706	0.00551694		Scn3b	-0.234328	0.0236494
Chrd	0.32364	0.00558067		8030462N17Rik	-0.257799	0.0237114
Ptgfrn	0.277853	0.005641		Kcnq3	-0.160915	0.0237703
Syngap1	0.180749	0.00573537		Ccdc134	-0.359009	0.0238045
Gm49601	0.603826	0.0057689		Ugcg	-0.264809	0.0238185
Vwa5b2	0.319503	0.00581335		Tmem181b-ps	-0.26789	0.0238574
Ptpn23	0.300883	0.00587287		Fndc3a	-0.224143	0.0239898
Eif4g3	0.199531	0.00588632		Prpf40a	-0.252467	0.0241378
Plpp3	0.17087	0.00598823		Alg11	-0.249671	0.0242352
Syt1	0.193632	0.00611507		Dcbld1	-0.426362	0.0243187
Zc3h13	0.243109	0.00613592		Sort1	-0.146486	0.0247381
Gm48796	0.765991	0.00614681		Nwd2	-0.284242	0.0248853
Uggt2	0.342964	0.00621313		Bicd1	-0.277471	0.0249625
ENSMUSG00000121179	0.275763	0.00626364		Dnm3	-0.22862	0.0249959
Kdm2a	0.222116	0.00633429		St8sia3	-0.188458	0.0251836
Plxna2	0.238696	0.0063359		Nr4a3	-0.24755	0.025401
Mcc	0.337585	0.00638475		Itch	-0.221512	0.0254292
Srrm2	0.263627	0.00640914		Mblac2	-0.27326	0.0255473
Hirip3	0.334442	0.0064278		Hecw2	-0.234003	0.0255941
Grin2a	0.280914	0.00644492		Galnt16	-0.185166	0.0257016
Ccdc9	0.278528	0.0064778		Alcam	-0.150677	0.0257875
Aifm3	0.276667	0.00649156		Stt3a	-0.216414	0.0258244
Arhgef25	0.187198	0.00669566		Scube1	-0.248301	0.025934
Tet2	0.373277	0.00675435		Bzw2	-0.247719	0.0259882
Clcn2	0.232771	0.00676409		Arfgef2	-0.21379	0.026039
Col11a2	0.357811	0.00692669		Mfsd4a	-0.200939	0.0260465
Mas1	0.368288	0.0069408		Akap6	-0.152051	0.0262725
Luc7l3	0.23695	0.00695693		Ccdc88a	-0.200973	0.0263145
Prr16	0.586686	0.00696877		Map7d2	-0.180736	0.0263802
Nphp3	0.472724	0.00709217		Mast4	-0.221536	0.0264907
Abca3	0.23437	0.00709952		Arid5b	-0.279884	0.0265823
Fezf2	0.280231	0.0071093		Fam126b	-0.211944	0.0268749
Nrxn1	0.179858	0.00716761		Pcdh10	-0.162058	0.0269575
Abcc8	0.354621	0.00717368		Rasgrf2	-0.200071	0.0270785
Cntn2	0.191031	0.00717964		Eif4g3	-0.151268	0.0270888
Tet3	0.290552	0.00720447		Ptprj	-0.205332	0.0272327
Lamp5	0.255014	0.00728486		Rapgef5	-0.185478	0.0273575
Atp11b	0.305611	0.0073031		Diaph2	-0.292641	0.0274043
Dag1	0.194671	0.00731225		Pcdhgc5	-0.224178	0.0275058
Mapk10	0.197499	0.0073162		Tgm3	-0.660204	0.0275509
Gja1	0.212191	0.0073247		Pcdh1	-0.150385	0.0275622
Ypel4	0.240371	0.00737393		Sptan1	-0.142956	0.0275946
Nudt6	1.04069	0.0075346		Ttc3	-0.13758	0.0278443
Pcnx2	0.250978	0.00755735		4933415A04Rik	-2.01511	0.0278708
Adamts1	0.49329	0.00765271		Rnf24	-0.239267	0.0279467
C030014I23Rik	4.21029	0.00767674		Pkp2	-0.40658	0.0280989
Tafa2	0.269816	0.00770922		Syngr1	-0.13187	0.0281373
Armcx4	0.25621	0.00778205		Rfx7	-0.27506	0.0282427
Gramd1b	0.193628	0.00791143		Reps2	-0.164907	0.0283556
Os9	0.169201	0.00807713		Atp2b4	-0.198714	0.0283795
Tle2	0.41042	0.00813557		Rbm26	-0.207787	0.0284786
Cds2	0.153285	0.0081859		St8sia1	-0.261347	0.0287072
Atp1a2	0.192827	0.00819957		Fam135b	-0.256119	0.0288697
Safb2	0.234955	0.00831952		Adgrl3	-0.211748	0.0289893
Daam1	0.207484	0.00833002		Rab30	-0.237099	0.0290171
Negr1	0.186609	0.00833602		Appl1	-0.192451	0.0291654
Srrm1	0.212382	0.00833622		Tnr	-0.225495	0.029351
Dcp2	0.232532	0.00844116		Gm15190	-2.51293	0.0293558
Abca7	0.342927	0.00844374		Eps15	-0.139051	0.0293736
Szt2	0.293993	0.00856544		Ighm	-0.201204	0.0293971
Gm48239	0.721762	0.00859536		Osbpl6	-0.239172	0.029398
Scn1b	0.192877	0.00862372		Tcaf1	-0.185781	0.0297514
Plcxd2	0.25001	0.00862609		Gsk3b	-0.17068	0.0299173
Plxna3	0.330948	0.00865602		Tmem106b	-0.153321	0.0301345
Fhod3	0.263139	0.00877151		Enc1	-0.226423	0.0301379
Pigt	0.212231	0.00880944		Klhl38	-2.71829	0.030321
Sting1	0.661921	0.00889744		Bri3bp	-0.160633	0.030368
Mfge8	0.194042	0.008962		Itgav	-0.181944	0.0304941
Mbd1	0.257876	0.00898866		Epb41l3	-0.161737	0.0306504
Pdgfra	0.234609	0.00910886		Dipk2a	-0.24758	0.0306882
Brd9	0.22307	0.00916192		Cpd	-0.189476	0.0307327
Slc4a8	0.215245	0.00916796		Akap11	-0.141667	0.0310043
Cep250	0.29634	0.00916834		Ppp1r14c	-0.337523	0.0311858
Arl5b	0.351037	0.00920486		Mir1198	-3.08514	0.0315341
Boc	0.334733	0.0092356		Gm37478	-3.59044	0.0316006
Ntm	0.169593	0.00925791		Ldb2	-0.242262	0.0318466
Gm10432	0.614616	0.00930611		Usp9x	-0.229142	0.0320788
Lingo1	0.205154	0.00934639		Ubr3	-0.157659	0.0321389
Atp2a3	0.515151	0.00940597		Mbd5	-0.216301	0.0324489
Celf5	0.193227	0.00940706		Rbfox1	-0.212224	0.0324634
Rrbp1	0.245409	0.00943268		Ep300	-0.201652	0.0327165
mt-Co2	0.764808	0.0095395		Rab3c	-0.14513	0.0327596
Csf1r	0.207097	0.00957808		Camk2d	-0.211605	0.0328583
Inka2	0.250709	0.0097864		Glyr1	-0.145669	0.0329419
Camk2d	0.27451	0.00985695		Dcp1a	-0.291251	0.0331971
Egr2	0.661735	0.0098811		Kcnk6	-0.504124	0.0333181
Rtn4r	0.324028	0.00990477		Sv2b	-0.190841	0.0335383
Brat1	0.361495	0.00992073		Atp8a1	-0.157101	0.033571
Sema6d	0.216707	0.0099859		Gprasp1	-0.177005	0.0336241
Ptprd	0.188551	0.0100048		Slc1a1	-0.216144	0.0336412
Tnip2	0.396099	0.0100105		Lrrn3	-0.2427	0.0336796
Rad54l2	0.30939	0.0101112		Bcl9	-0.219714	0.0337033
Eda	0.505855	0.0101295		Tenm2	-0.21105	0.0337577
Sirpa	0.157079	0.0102487		Sp110	-1.01969	0.033758
Tmem63c	0.280363	0.010403		Nsf	-0.202021	0.0339184
Cep164	0.420678	0.0104647		Oprl1	-0.247039	0.0341635
Lrrfip1	0.300035	0.0105086		Cacna1e	-0.165113	0.0342197
Ipo9	0.187914	0.0105853		Tlr8	-4.01213	0.0343708
Trim41	0.226255	0.0105932		Slitrk3	-0.226007	0.0346411
Nat8l	0.170751	0.0107589		Fmr1	-0.186999	0.0346818
Mical2	0.202079	0.0108191		Elavl4	-0.245271	0.0348618
Kalrn	0.193942	0.0108203		Gpm6a	-0.124939	0.0351965
Clasp1	0.208049	0.0109095		Ntrk3	-0.155643	0.0352558
Spock1	0.211215	0.0109594		Pbrm1	-0.228384	0.0353172
Acox3	0.289506	0.011042		Cyp2j6	-0.217919	0.035338
Sec14l2	0.211842	0.0111714		Zeb2	-0.178983	0.0353585
Rorb	0.285367	0.0112152		4930534D22Rik	-2.62229	0.0354104
Setd1a	0.345712	0.0112847		B230209E15Rik	-0.309115	0.0356312
S100a11	0.548526	0.0113011		Zfp660	-0.66999	0.0358148
Fzd4	0.359973	0.0113087		Gls	-0.139367	0.0359647
Zbtb34	0.429146	0.0113436		Jazf1	-0.315865	0.0360737
Gm44168	0.611152	0.0113569		Gm15541	-3.51469	0.036341
Col19a1	0.643229	0.0113926		Scn1a	-0.178312	0.0363781
Vars	0.234977	0.0114148		Ckap5	-0.152949	0.0364594
Emc1	0.201137	0.0114824		Apol8	-0.595742	0.0367909
ENSMUSG00000121177	2.84471	0.0115136		Slc2a3	-0.179349	0.0368122
Hmgcr	0.183814	0.0115502		Btrc	-0.203629	0.0368274
Ice1	0.210261	0.0115601		Zdhhc9	-0.216084	0.036949
Ankrd52	0.244146	0.0116231		Slc6a6	-0.158733	0.0370604
Dnajb5	0.256239	0.0116288		Tril	-0.172081	0.0371297
Ckap4	0.329385	0.0116385		1700016A09Rik	-1.51608	0.0373413
Rbm33	0.260848	0.0116746		Phtf1	-0.254873	0.0373449
Egfr	0.353885	0.0117555		Stxbp1	-0.151687	0.0373746
Slc38a3	0.216177	0.0118294		Rnf14	-0.191962	0.0375194
Dhcr7	0.242074	0.0118636		Rtn4rl1	-0.207969	0.0377826
Dnajc16	0.230975	0.0119544		Tmprss3	-3.98416	0.0378828
Dtx4	0.237765	0.0120174		Relt	-0.272086	0.0379058
Tnfrsf25	0.706912	0.0120409		Nell2	-0.205787	0.0380431
Gm49327	0.581102	0.0120679		Prkca	-0.18118	0.0380453
Mafb	0.329574	0.0120688		Homer1	-0.222598	0.0381292
Slc6a6	0.204298	0.0121037		Dcun1d4	-0.176189	0.0381773
Car7	0.413269	0.0122347		Col25a1	-0.245955	0.0385067
Eml3	0.324866	0.0122953		Necab1	-0.231755	0.0388167
C130074G19Rik	0.246199	0.0123182		Cul3	-0.158724	0.0388746
Atp1a1	0.208664	0.012357		Lingo2	-0.319176	0.0389594
Sik1	0.424029	0.0124447		Fen1	-0.990943	0.0389761
Dscam	0.229014	0.0125152		Cntn3	-0.293236	0.0390889
Mpdz	0.240392	0.012576		4933433G19Rik	-1.0189	0.0392651
Ulk3	0.338549	0.0126021		Dmxl2	-0.156103	0.0393263
Rnf24	0.277545	0.0126283		Lrfn5	-0.217802	0.0394357
Gm22009	1.25046	0.0127345		H1f11-ps	-1.04659	0.0396392
Map1a	0.173913	0.0129195		Gm48931	-1.85945	0.0398616
Gm44860	4.46696	0.0130334		Ank2	-0.130972	0.0398697
Flnb	0.279325	0.0130686		Hecw1	-0.19798	0.0399015
Gm12940	0.425018	0.0130876		Zyg11b	-0.17467	0.0399034
Kcnt1	0.246819	0.01314		Tdrd9	-1.27796	0.0399249
Chil1	0.347001	0.0131622		Gpr158	-0.160505	0.040078
Prr36	0.342988	0.0132482		Gm43032	-0.844197	0.0401048
Sema4c	0.377908	0.0134234		Chd6	-0.188125	0.0401521
Sprn	0.180137	0.0134644		Atrnl1	-0.171924	0.0402174
Cep350	0.252965	0.0134751		Tmem255a	-0.322617	0.0404636
Srgap3	0.178325	0.0137107		Tssk3	-2.96746	0.0408016
Gm16581	2.79586	0.0137714		ENSMUSG00000120926	-0.692956	0.0408914
Celsr3	0.304325	0.0137772		Tenm3	-0.199004	0.0409334
Dusp1	0.438989	0.0139516		AW551984	-0.556883	0.040987
Man2c1	0.254609	0.0140724		A2ml1	-0.411564	0.0410513
Sp110	1.3232	0.0141		Lmbrd1	-0.137847	0.0411325
Gm48181	4.06031	0.014251		Vps37a	-0.17436	0.0412585
Dicer1	0.244049	0.0142915		Pcdhb11	-0.56224	0.0414974
Flot1	0.17318	0.0143524		Nbea	-0.15531	0.0415896
Ift172	0.230455	0.0143595		Nefm	-0.197108	0.0419797
Klf10	0.365462	0.0144315		Sirpa	-0.123842	0.0421385
Tub	0.177368	0.01444		Gad2	-0.231851	0.0421507
Cacna1a	0.211838	0.0144833		Ndst3	-0.296761	0.0421754
Hic2	0.578328	0.0144946		Snord3b-ps2	-2.3148	0.0422274
Atxn2l	0.239852	0.0145528		Nptx1	-0.18064	0.0424101
Kcnf1	0.182061	0.0145781		Zfp804a	-0.356283	0.0425698
Aldh1a2	0.39196	0.014583		Ptprh	-0.771977	0.0426964
Scn1a	0.210524	0.01462		Disp2	-0.18861	0.0427983
Aplp2	0.143122	0.0146962		Gm43636	-1.54263	0.0428263
A2ml1	0.51238	0.0147705		Kcnj3	-0.190053	0.0428294
Dgat1	0.302988	0.0147738		Slc35f1	-0.202258	0.0428898
Fendrr	1.22443	0.014832		Myadm	-0.219579	0.0430915
Gpr162	0.172038	0.0148787		St6galnac5	-0.187662	0.0430976
Mapk11	0.259395	0.014928		Adam23	-0.145158	0.0433117
Nr4a1	0.597409	0.0149534		Prrc2c	-0.159619	0.0434624
Ablim1	0.198252	0.0150801		Man1a2	-0.165553	0.0436645
Phf24	0.198051	0.0151263		Spcs3	-0.177734	0.0439156
Cacna1c	0.221755	0.0153714		Gm18649	-0.864129	0.0441704
Lingo2	0.360172	0.015486		Asap1	-0.161613	0.0443146
Rsad1	0.37249	0.015501		Efr3a	-0.166683	0.0444909
Tyk2	0.312609	0.0155251		Lrrc57	-0.202308	0.0446853
Gan	0.27193	0.015545		Rpl15-ps5	-3.92877	0.0447226
Slc1a2	0.198404	0.0156664		Stard4	-0.206587	0.0447368
Dot1l	0.27949	0.0157086		Dock3	-0.15142	0.0448012
Prkcg	0.210672	0.0157163		Fam171b	-0.120635	0.0448484
Fam83h	0.700975	0.0157437		Mycbp2	-0.145138	0.044853
Zfp46	0.251466	0.0158274		Tfcp2	-0.252302	0.0448746
Rps28	0.19776	0.0159036		Setx	-0.192859	0.0451872
Zfp592	0.280781	0.01596		Slc7a8	-0.182747	0.0453332
Miat	0.630453	0.0160071		Champ1	-0.234568	0.0454932
Slc35f2	0.6153	0.0160099		Mettl21c	-2.97181	0.0455754
Pex5l	0.170287	0.0160276		Dennd4a	-0.183957	0.0456518
Kmt2d	0.229643	0.0160436		Prkce	-0.140215	0.045809
Zfp692	0.340344	0.0162681		Gm37027	-3.40923	0.0458445
Arsb	0.18242	0.0162969		ENSMUSG00000120889	-3.89873	0.0459324
Slc38a9	0.337974	0.016307		Eif3j1	-0.206368	0.0461324
Slc13a5	0.400472	0.0163339		Trim33	-0.187801	0.0463339
Kif1b	0.158784	0.0163502		Vcp-rs	-0.287754	0.0463551
Ints1	0.209441	0.0163518		6330537M06Rik	-1.10309	0.0465769
Atf7	0.298905	0.0165572		Slc4a8	-0.16092	0.0466755
Jag2	0.238067	0.0167136		Rock2	-0.174874	0.0468034
Gm9929	0.875302	0.0167178		Sik2	-0.320149	0.0468109
Fam214b	0.25099	0.0167278		Gng2	-0.199251	0.0468388
Porcn	0.232601	0.0167448		Lcorl	-0.293623	0.0468792
Ephb6	0.253908	0.0168983		Ranbp2	-0.165762	0.0470866
Siglech	0.297532	0.0169127		Arhgap31	-0.232352	0.0472699
Abcg4	0.228423	0.0169445		Dnajb4	-0.181974	0.0473033
Zfp398	0.310017	0.0169836		Slitrk4	-0.25231	0.047429
Insr	0.225619	0.0170314		Dnajc13	-0.181792	0.0478334
Pip4k2c	0.185255	0.0170511		Gm28651	-3.05635	0.047843
Rab11fip4	0.167838	0.0171918		AI593442	-0.176291	0.0478897
Slc23a2	0.204406	0.0172465		Mkln1	-0.183986	0.0479068
Gpr3	0.554073	0.0173753		Mapk8	-0.192083	0.0480534
Rapgef5	0.198873	0.0174004		Srgap2	-0.17269	0.0480581
Slc12a5	0.161073	0.0174246		Tyw3	-0.411677	0.0482281
Srgap2	0.212072	0.0174784		B430212C06Rik	-2.16488	0.0484761
Gigyf1	0.231229	0.0175092		Cadps2	-0.177105	0.0484946
Plbd2	0.19822	0.0175099		Tmem263	-0.21132	0.0486854
Ptprs	0.170419	0.0176201		Wasl	-0.193312	0.0488442
Gm10988	3.92345	0.0176408		Mir22hg	-0.257684	0.0488717
Slc4a3	0.20946	0.0177946		Gabrg3	-0.243406	0.0488959
Ptprz1	0.154081	0.0178329		Nrip1	-0.227931	0.0489817
Actn4	0.16182	0.0180119		Tcf4	-0.133328	0.0490549
Sorl1	0.175096	0.0180379		Atrn	-0.169603	0.0490633
Tjap1	0.296914	0.018074		Omg	-0.146725	0.0490884
Pknox2	0.213567	0.0181269		Hapln4	-0.174939	0.0491118
Pcdhgc5	0.221379	0.0181721		Camta1	-0.13821	0.0491764
Fbxl20	0.222789	0.018303		Rasd1	-0.432952	0.0492001
Psap	0.125588	0.0183092		Pcdhga11	-0.355299	0.0492828
Per2	0.276287	0.0183108		Dnajb3	-0.838059	0.0493785
Cpeb1	0.223018	0.0184459		Galnt11	-0.200663	0.0494516
Ptprb	0.287273	0.0184721		Magee1	-0.186462	0.0494561
Cd79a	1.98056	0.018535
Slc22a8	0.299679	0.0186308
Lmtk3	0.188772	0.0186571
Chd2	0.23345	0.0187164
Tbc1d30	0.250987	0.0187557
Usp35	0.282086	0.0187741
Haghl	0.200937	0.0188437
Spg11	0.333524	0.0189042
Mfap3l	0.201213	0.0189074
Dusp6	0.305692	0.0190095
Phf13	0.372532	0.0191211
Tubb4a	0.179882	0.0191281
Luzp2	0.156742	0.0191602
Nucks1	0.172145	0.0191703
Nktr	0.242945	0.019203
Scarb2	0.186461	0.0192109
Slc8a2	0.183045	0.0192215
Aloxe3	0.533446	0.0192516
Pdcd4	0.206415	0.0192705
Dync1li2	0.14072	0.0196497
Tceal5	0.20193	0.0197427
Agrn	0.200224	0.0198106
Ldc1	3.87529	0.0199638
Il17ra	0.286624	0.0200491
Etv4	0.35262	0.0201579
Adam22	0.167693	0.0201826
Gm40841	0.380119	0.020188
Trpm4	0.295276	0.0203337
Pla2g4e	0.572324	0.0204416
Gm36899	1.01935	0.0204453
Ppp4r1l-ps	0.271697	0.020554
Itgb3	0.655799	0.0205661
Mroh1	0.209792	0.0205686
Fam180a	0.619144	0.0206139
Wnt2b	0.855952	0.0206409
Astn1	0.164023	0.0206949
Ptpre	0.27451	0.0207531
Slc7a11	0.203275	0.0207757
Plxnd1	0.228231	0.020837
Greb1l	0.540835	0.0208631
Notch3	0.395306	0.0209392
Adam17	0.288336	0.0209725
Sel1l3	0.250205	0.0210233
Plekhh2	0.442064	0.0210999
Sox5	0.255865	0.0212187
Dgke	0.196558	0.0212736
Cc2d1b	0.303706	0.0214281
Sytl2	0.200426	0.0214471
Slc30a3	0.24738	0.0214738
Sema4f	0.221988	0.0215074
Zfp660	0.840702	0.0215924
Pgap6	0.317117	0.0217335
Sez6l	0.18325	0.0218317
H2-K1	0.218971	0.0219004
Angel1	0.429476	0.0221576
Pabpn1	0.276517	0.0221583
Slc1a4	0.195255	0.0222786
Spag5	0.414856	0.0224953
Gpr146	0.281288	0.0226289
Ammecr1l	0.374732	0.0226791
Bmp1	0.268573	0.0227216
St3gal1	0.313244	0.0227835
Ubp1	0.214262	0.0228115
Aebp1	0.31049	0.0228366
Kcnc4	0.193957	0.0231329
Abtb1	0.230617	0.0232354
Tbl2	0.261929	0.0235095
Ptprt	0.174742	0.0235572
Gm42979	0.650388	0.0235576
Dmp1	0.357154	0.0236012
Inhbb	0.409062	0.0236641
Akap8l	0.235882	0.0236823
Trpm2	0.237446	0.0237627
Iqce	0.24498	0.0237975
Snrnp70	0.423121	0.0238724
Rpl37	0.150774	0.0239245
Ankrd24	0.295245	0.0240275
Nav3	0.211763	0.0240646
Pgd	0.218456	0.0241551
Faim2	0.145598	0.024156
Nfix	0.18405	0.0242281
Lmtk2	0.163594	0.0242798
Trim3	0.170374	0.0243656
Arfgap1	0.175835	0.0244649
Slc6a20a	0.33507	0.0244926
Sart1	0.195534	0.024563
Golim4	0.254678	0.0247408
Lsamp	0.152035	0.0248597
Dlgap1	0.141028	0.0250331
Plod3	0.255228	0.0250556
Ets1	0.373913	0.0251425
Slc38a7	0.260027	0.0252241
Tmem214	0.216679	0.0253037
Fam222b	0.284951	0.0253518
Arhgap32	0.166509	0.0254194
Htr3a	0.490778	0.0254209
Hepacam	0.172994	0.0254619
Cnih3	0.192749	0.0255318
Prickle1	0.19594	0.0255419
Dgkq	0.288522	0.0255802
Rbm25	0.213655	0.0257328
Map4k2	0.234322	0.0257575
Tecpr2	0.21811	0.0257899
Wfikkn2	0.52271	0.0261059
Scd2	0.129177	0.0261886
Prpf38b	0.218767	0.0262078
Plxna4	0.207391	0.0262773
Meg3	0.522882	0.0264525
Arl4c	0.20561	0.0264602
Rhbdf1	0.32273	0.0265218
Mir124a-1hg	0.514754	0.0266692
Npc1	0.195582	0.026925
Mycbp2	0.151783	0.026927
Csmd1	0.239372	0.0270313
Cramp1	0.248916	0.0270923
Camk1d	0.170091	0.0271065
Opcml	0.17263	0.0272026
Gm16172	0.969245	0.0272091
Mlip	0.240533	0.0274483
Kcnq5	0.182567	0.0275013
Hnrnpa1	0.150328	0.0275267
D430041D05Rik	0.216858	0.02753
Zc3h7a	0.224088	0.027542
Rusc1	0.19211	0.0275826
Gm3510	0.673796	0.0275888
Maco1	0.188293	0.0276431
Als2cl	0.372864	0.0277
Pamr1	0.256941	0.0277878
Baz2a	0.194836	0.027854
Ptprj	0.216367	0.0279003
Ssh3	0.275122	0.0279322
Tmem150a	0.404486	0.0280078
Adora1	0.164755	0.0281925
Pclo	0.15463	0.0282824
Gm37608	1.8926	0.0282917
Ifnar1	0.225088	0.0283606
Irf2bp2	0.23425	0.0283984
Ano8	0.190789	0.028426
Epha4	0.18794	0.0285871
Cdc25b	0.309262	0.0285886
Dcaf7	0.147602	0.0286477
Gm26843	1.16193	0.0287839
Nvl	0.218912	0.0288177
Zfp687	0.2222	0.0288496
Rpl36a	0.189287	0.0289291
Men1	0.210158	0.0289381
Micall2	0.642357	0.0290184
Syt11	0.124795	0.0291684
Col4a2	0.26986	0.0292717
Gatd1	0.240624	0.0293108
Gpam	0.17858	0.0293785
Adcy2	0.162776	0.0293795
Adcyap1r1	0.143817	0.0294552
Fam3c	0.176349	0.0295712
Sbno2	0.292029	0.0295951
4930526A20Rik	2.53068	0.029605
Zfp568	0.669664	0.0296215
Elp2	0.167734	0.0298586
Mirg	0.376563	0.0299284
Nell2	0.172759	0.0300464
Fam131a	0.18606	0.0301446
Pcnx3	0.20377	0.0302058
Satb2	0.296651	0.0302913
Slc20a2	0.201423	0.0303693
Gm38124	1.26601	0.0304886
Arid1a	0.155464	0.0305529
Mapk15	0.708396	0.0305823
Arnt2	0.164834	0.03059
Otx1	0.473992	0.0306804
Cpa3	4.18719	0.0307015
Tnrc6c	0.185218	0.0307221
Pfas	0.238979	0.0307229
Cntrob	0.308784	0.0310186
Bsn	0.194147	0.0310763
Gm13629	0.605768	0.0313333
Sorbs2	0.199557	0.0313703
Syn1	0.150973	0.0314224
Dpy19l1	0.236662	0.0314848
Gm9821	0.650337	0.0316571
Sh2d3c	0.33738	0.0317495
Srpk1	0.188007	0.0317982
Il17rd	0.495758	0.0318031
Hdac6	0.196008	0.0318434
Gm11766	0.783617	0.0318746
Nlgn3	0.217208	0.031954
Efnb1	0.353872	0.032272
Rnf19a	0.239591	0.0324059
Cds1	0.173696	0.0325056
Adamts10	0.279478	0.0325678
Lrrc4c	0.180106	0.0325974
Slco1c1	0.191218	0.0326219
Arglu1	0.216673	0.0326765
Plxna1	0.171558	0.0329774
Celf3	0.167518	0.0330214
Ptpn14	0.298455	0.0331468
Myorg	0.193647	0.0331657
Slc24a2	0.148125	0.0333074
Lss	0.222892	0.033348
Slc9a3r1	0.159253	0.0334883
Gm24616	4.10748	0.0335061
Gm45487	4.10748	0.0335061
Ncmap	1.7678	0.0335413
Gm15541	3.61033	0.0336658
Rere	0.157895	0.0337342
D030047H15Rik	0.517594	0.0338082
Itga3	0.300134	0.0339248
Rfx1	0.270144	0.0339551
Rskr	0.548199	0.0339674
Zgpat	0.229583	0.0339721
Tnpo2	0.137378	0.0339794
Galnt17	0.187622	0.0342111
Adam33	0.535455	0.0342494
Ninl	0.412287	0.0343123
Bcan	0.175026	0.0343129
Inava	0.609672	0.0343354
Dvl2	0.267091	0.0343529
Glg1	0.148314	0.034367
Dlg5	0.215768	0.0343787
Dyrk2	0.216221	0.034395
Usp48	0.188232	0.034445
Megf8	0.141873	0.0344812
Gm12709	0.661213	0.0347071
Ranbp10	0.223978	0.0347948
ENSMUSG00000120429	4.1063	0.0348742
Col16a1	0.29113	0.0348887
Aqp11	0.239834	0.0349136
Slc27a4	0.165575	0.0349582
Arhgap17	0.325822	0.0350642
Myo10	0.180101	0.0351063
Ubr5	0.16852	0.0353672
Phf21b	0.311702	0.0355944
Pkd1	0.229789	0.0356102
Zdhhc21	0.202847	0.0356617
Tgm3	0.638926	0.0356867
Asphd1	0.214264	0.0359198
Lmna	0.225175	0.0359365
Xylt2	0.247916	0.0359644
2600014E21Rik	0.756871	0.0359968
Zcchc2	0.255259	0.036003
Tubb2b	0.137652	0.0361516
Lnpep	0.168645	0.0362233
Bin1	0.130916	0.0363166
Pwwp3a	0.218838	0.0363989
Hps1	0.315659	0.0364171
Cep162	0.346863	0.0364281
Scg3	0.145061	0.0364444
Pcnt	0.214919	0.0364987
Pdgfrb	0.253354	0.036622
Itpr2	0.240148	0.036638
Sltm	0.196224	0.0366863
Man2b1	0.19634	0.0366981
Cx3cr1	0.176974	0.0371194
Fosl2	0.207613	0.0371653
Stk11ip	0.243477	0.0372589
Tpcn1	0.189092	0.0373283
Prpf40b	0.209284	0.0374917
Relt	0.275378	0.037499
Drp2	0.181848	0.0377462
Rrnad1	0.317982	0.0378118
Firre	0.241141	0.0378124
Stmn4	0.157554	0.0378977
Adamts17	0.59469	0.0379215
Sfswap	0.214601	0.0379457
Tcirg1	0.303734	0.0381657
Csrnp1	0.410623	0.0381984
Slc39a2	0.425577	0.0382009
Zfp57	0.403948	0.0382066
H2-M6-ps	1.29111	0.0383208
Kmt2a	0.168089	0.0383291
Ncapd2	0.301424	0.0383703
Xylt1	0.198019	0.0385526
Lif	1.07162	0.0385954
Capn5	0.209262	0.0386148
Clec2i	4.0784	0.0386608
Vsir	0.219051	0.0387548
Ubr2	0.179461	0.0388511
Ccdc136	0.205699	0.0388904
Tdrd9	1.26822	0.0389081
Zbtb16	0.268216	0.0389568
Sowahb	0.320021	0.0389967
Lamb2	0.209617	0.0390401
Gm20636	1.11617	0.0394976
2900026A02Rik	0.180569	0.0395247
Tnfrsf18	0.88824	0.0395363
Tert	0.962198	0.0395458
Nsd1	0.15314	0.0396693
Braf	0.159912	0.0396798
9330151L19Rik	0.354245	0.0397108
Fdx2	1.98124	0.0397975
Wscd1	0.175603	0.0399685
AW011738	0.375844	0.0399686
Pm20d1	0.590781	0.0400742
Trib1	0.319885	0.0401104
Gm16754	0.933485	0.0401127
Rel	0.541257	0.0401942
Myo1c	0.297042	0.0401969
Cntn3	0.26547	0.0404138
Gm12960	0.351412	0.0405653
Map3k9	0.292899	0.0405679
Spred3	0.213081	0.0406452
Gm52965	1.31447	0.0407407
Sulf2	0.161467	0.0407674
Dcst2	1.06511	0.0409679
Ddx55	0.258336	0.041116
Igf2r	0.225956	0.0411542
Tmed9	0.145393	0.0411692
Dnajc5	0.124499	0.0412339
Cc2d2a	0.266475	0.0414321
Pag1	0.255935	0.0414447
Gm36640	3.52538	0.0414789
Cul9	0.175468	0.0415251
Mib2	0.148928	0.0415557
ENSMUSG00000120926	0.714288	0.0416687
Mex3a	0.585974	0.041711
Sptbn4	0.159517	0.0417412
ENSMUSG00000121170	4.08427	0.0419658
Ptbp1	0.247721	0.042006
Morn1	0.465261	0.0421309
Phka2	0.299071	0.042201
Csmd2	0.225742	0.0422142
Myh10	0.152257	0.0426374
Gm9801	1.0051	0.0427384
Wtip	0.42781	0.0429646
Tcf4	0.131995	0.0430302
A530010L16Rik	4.19229	0.0431317
Ralgapb	0.145201	0.043134
Gm2415	0.187957	0.0431373
Bcl9	0.207954	0.0431489
Fam193b	0.250442	0.0432045
Gramd4	0.184836	0.0433263
Klhl38	2.41101	0.0433579
F730043M19Rik	0.232088	0.0435496
Shisa7	0.16218	0.0437267
Adra1d	0.262189	0.0437374
Ophn1	0.194637	0.0438799
Clk3	0.234441	0.0439073
Ssh1	0.250225	0.0439995
Uhrf1bp1	0.244245	0.0440373
Lpcat2	0.344103	0.0440682
Mdfic2	0.750744	0.0441613
Igdcc4	0.193032	0.0442038
9330121K16Rik	0.28076	0.0442423
Slc66a1	0.35612	0.0443743
Slc16a11	0.280305	0.0444311
Mapk8ip3	0.119288	0.0444761
Tnr	0.190635	0.0444926
Gm9057	1.65273	0.0445155
Gm44562	0.927702	0.0445317
Slitrk1	0.200311	0.044536
Cep152	0.569895	0.0445388
Gm44439	3.995	0.0447334
Shisa5	0.16579	0.0447916
Gm8783	2.01164	0.0448118
Utp14b	0.258386	0.044933
Katnip	0.232601	0.0449584
Gm11734	1.42474	0.0450001
Atp8b1	0.547598	0.0451755
Gm12070	0.441401	0.0452277
Gm15408	1.03108	0.0453445
Atp13a4	0.277677	0.0453845
Fbxw7	0.136322	0.0454137
Iffo1	0.187561	0.045458
Sfxn3	0.153656	0.0454997
Rfx7	0.241816	0.0456303
Dido1	0.173492	0.045668
H2-Bl	1.0884	0.0459202
Utp15	0.247582	0.0460681
Nr6a1	0.408362	0.0460934
Spata2	0.182011	0.0461712
Polr1a	0.213155	0.0462624
Fnbp1	0.155569	0.0463094
Zfp697	0.266148	0.0463472
Gm27032	0.261275	0.0463838
Pom121	0.196409	0.0465201
P2rx7	0.334886	0.0466193
Rsrp1	0.178769	0.0467388
Stum	0.142469	0.0469584
Setd6	0.320253	0.0471848
Flna	0.206211	0.0472405
Ccnk	0.253038	0.047332
A330023F24Rik	0.346706	0.0473721
Sestd1	0.229126	0.0477175
Gm32849	2.68824	0.0477258
Bpifb9a	3.16128	0.0477436
Myo19	0.409243	0.0478076
Pfkfb4	0.29527	0.0478968
mt-Nd4	0.182776	0.0479473
Gm35248	1.51707	0.0479683
Carmil3	0.227047	0.0479902
Chrdl1	0.256102	0.0483568
S1pr3	0.405056	0.0484052
Cmtm4	0.145626	0.0485488
Slc43a2	0.176713	0.048553
Tob2	0.220968	0.0486632
Hdgfl2	0.165064	0.0487187
Bmp2k	0.257871	0.0487438
Tal1	0.757554	0.0487442
Kat6b	0.189698	0.0487529
Sparcl1	0.11429	0.0488176
Ankrd31	1.74674	0.0488438
Slc15a2	0.210347	0.0491425
Smg6	0.192472	0.0492453
Gm28198	3.50392	0.0494438
Slc3a2	0.153055	0.0494457
Vav1	0.456772	0.049626
Sec1	0.812697	0.049719
Prrc2c	0.162063	0.0497242
Acacb	0.400652	0.0499843

## Sheet: Supplementary Table4
Primer sets for qPCR
Primer	Sequence (5’–3’)
Vip-F	TCCCATTAGGCTTTGCAATC
Vip-R	TCCATAGCACACGCAGAAAG
Ndnf-F	GATGCCGTTCAAGTCCAAGT
Ndnf-R	CAGCTTTGATGCTCCTTTCC
Sst-F	GCAGAGGTCTGCCAACTCGAAC
Sst-R	GTTTGGGGGAGAGGGATCAGAG
Reln-F	CAGACCCAGTGCCTACCTTCCT
Reln-R	GGAGCTGGATGGTGATCCTCTT
Calb2 (Calretinin)-F	GATTCCTGTCTGACCTCCTGAAGA
Calb2 (Calretinin)-R	CATCCGTAGTATGGTCTGGGTGTA
Gad1 (GAD67)-F	GCGGGAGCGGATCCTAATA
Gad1 (GAD67)-R	TGGTGCATCCATGGGCTAC
Gad2 (GAD65)-F	CCTGGTTAGAGAGGAGGGACTGA
Gad2 (GAD65)-R	CATAGTGCTTATCTTGCTGAAAGAGGTA
Prox1-F	AGTGCCATGAATCCCCAAGGTT
Prox1-R	AGTTCGCCCTCTTCAGCAGCTT
Nr2f2 (CoupTF II)-F	GAAGCTCAAGGCACTGCACGTC
Nr2f2 (CoupTF II)-R	TGCAAGCTTTCCACATGGGCTA
Sox6-F	TCTCATCCCGGCCTAAGACAGC
Sox6-R	CTCTCCCCAGGCTTCCTCCAAT
Notch1-F	TGTTGTGCTCCTGAAGAACG
Notch1-R	GCAACACTTTGGCAGTCTCA
Hes5-F	GCACATTTGCCTTTTGTGAA
Hes5-R	ATGTGGACCTTGAGGTGAGG
Gapdh-F	TGTTCCAGTATGACTCCACTCACG
Gapdh-R	AGTAGACTCCACGACATACTCAGC
